# Supplementary material for: Cry3Aa Toxin Is Not Suitable to Control Lepidopteran Pest Spodoptera littoralis (Boisd.)
Source: MDPI journal article supplement (doi:10.3390/plants11101312), 2022-05-15
Supplement: s1 [file s1]

# Supplementary Materials: Cry3Aa Toxin Is Not Suitable to Control Lepidopteran Pests *Spodoptera littoralis* (Boisd.)

Oxana Skoková Habuštová, Zdeňka Svobodová, Dalibor Kodrík and František Sehnal

**Table S1: A.** Results of Log-rank (Mantel-Cox) test with Bonferroni correction of  $\alpha$  level of difference between survival curves of *L. decemlineata* in bioassay 1 with recombinant (Bonferroni correction:  $\alpha = 0.0024$ ) and natural Cry3Aa (Bonferroni correction:  $\alpha = 0.0011$ ) in artificial diet and with Cry3Aa expressed in GM potato SNL. Statistically significant p-values are highlighted in bold.

| Toxin              | Compared treatments                        | Chi square ( $\chi^2$ ) | df | p                 |
|--------------------|--------------------------------------------|-------------------------|----|-------------------|
| Recombinant Cry3Aa | Control x 1 $\mu\text{g/g}$                | 10.51                   | 1  | <b>0.0012</b>     |
|                    | Control x 2 $\mu\text{g/g}$                | 28.01                   | 1  | <b>&lt;0.0001</b> |
|                    | Control x 4 $\mu\text{g/g}$                | 40.69                   | 1  | <b>&lt;0.0001</b> |
|                    | Control x 6 $\mu\text{g/g}$                | 59.99                   | 1  | <b>&lt;0.0001</b> |
|                    | Control x 8 $\mu\text{g/g}$                | 59.95                   | 1  | <b>&lt;0.0001</b> |
|                    | Control x 10 $\mu\text{g/g}$               | 69.29                   | 1  | <b>&lt;0.0001</b> |
|                    | 1 $\mu\text{g/g}$ x 2 $\mu\text{g/g}$      | 7.58                    | 1  | 0.0059            |
|                    | 1 $\mu\text{g/g}$ x 4 $\mu\text{g/g}$      | 17.14                   | 1  | <b>&lt;0.0001</b> |
|                    | 1 $\mu\text{g/g}$ x 6 $\mu\text{g/g}$      | 33.15                   | 1  | <b>&lt;0.0001</b> |
|                    | 1 $\mu\text{g/g}$ x 8 $\mu\text{g/g}$      | 23.01                   | 1  | <b>&lt;0.0001</b> |
|                    | 1 $\mu\text{g/g}$ x 10 $\mu\text{g/g}$     | 41.84                   | 1  | <b>&lt;0.0001</b> |
|                    | 2 $\mu\text{g/g}$ x 4 $\mu\text{g/g}$      | 1.89                    | 1  | 0.1697            |
|                    | 2 $\mu\text{g/g}$ x 6 $\mu\text{g/g}$      | 9.33                    | 1  | <b>0.0023</b>     |
|                    | 2 $\mu\text{g/g}$ x 8 $\mu\text{g/g}$      | 3.66                    | 1  | 0.0556            |
|                    | 2 $\mu\text{g/g}$ x 10 $\mu\text{g/g}$     | 14.86                   | 1  | <b>&lt;0.0001</b> |
|                    | 4 $\mu\text{g/g}$ x 6 $\mu\text{g/g}$      | 3.01                    | 1  | 0.0827            |
|                    | 4 $\mu\text{g/g}$ x 8 $\mu\text{g/g}$      | 0.15                    | 1  | 0.6946            |
|                    | 4 $\mu\text{g/g}$ x 10 $\mu\text{g/g}$     | 6.82                    | 1  | 0.0090            |
|                    | 6 $\mu\text{g/g}$ x 8 $\mu\text{g/g}$      | 2.27                    | 1  | 0.1322            |
|                    | 6 $\mu\text{g/g}$ x 10 $\mu\text{g/g}$     | 1.41                    | 1  | 0.2346            |
| Natural Cry3Aa     | 8 $\mu\text{g/g}$ x 10 $\mu\text{g/g}$     | 6.88                    | 1  | 0.0087            |
|                    | Control x 0.01 $\mu\text{g/g}$             | 5.89                    | 1  | 0.0152            |
|                    | Control x 0.1 $\mu\text{g/g}$              | 22.53                   | 1  | <b>&lt;0.0001</b> |
|                    | Control x 0.5 $\mu\text{g/g}$              | 38.69                   | 1  | <b>&lt;0.0001</b> |
|                    | Control x 1 $\mu\text{g/g}$                | 97.75                   | 1  | <b>&lt;0.0001</b> |
|                    | Control x 2 $\mu\text{g/g}$                | 69.50                   | 1  | <b>&lt;0.0001</b> |
|                    | Control x 4 $\mu\text{g/g}$                | 88.00                   | 1  | <b>&lt;0.0001</b> |
|                    | Control x 6 $\mu\text{g/g}$                | 77.73                   | 1  | <b>&lt;0.0001</b> |
|                    | Control x 8 $\mu\text{g/g}$                | 80.72                   | 1  | <b>&lt;0.0001</b> |
|                    | Control x 10 $\mu\text{g/g}$               | 81.21                   | 1  | <b>&lt;0.0001</b> |
|                    | 0.01 $\mu\text{g/g}$ x 0.1 $\mu\text{g/g}$ | 6.46                    | 1  | 0.0110            |
|                    | 0.01 $\mu\text{g/g}$ x 0.5 $\mu\text{g/g}$ | 14.26                   | 1  | <b>0.0002</b>     |
|                    | 0.01 $\mu\text{g/g}$ x 1 $\mu\text{g/g}$   | 69.39                   | 1  | <b>&lt;0.0001</b> |
|                    | 0.01 $\mu\text{g/g}$ x 2 $\mu\text{g/g}$   | 40.99                   | 1  | <b>&lt;0.0001</b> |
|                    | 0.01 $\mu\text{g/g}$ x 4 $\mu\text{g/g}$   | 60.08                   | 1  | <b>&lt;0.0001</b> |
|                    | 0.01 $\mu\text{g/g}$ x 6 $\mu\text{g/g}$   | 55.63                   | 1  | <b>&lt;0.0001</b> |

|                     |       |   |         |
|---------------------|-------|---|---------|
| 0.01 µg/g x 8 µg/g  | 51.58 | 1 | <0.0001 |
| 0.01 µg/g x 10 µg/g | 58.2  | 1 | <0.0001 |
| 0.1 µg/g x 0.5 µg/g | 4.17  | 1 | 0.0412  |
| 0.1 µg/g x 1 µg/g   | 82.56 | 1 | <0.0001 |
| 0.1 µg/g x 2 µg/g   | 36.55 | 1 | <0.0001 |
| 0.1 µg/g x 4 µg/g   | 68.35 | 1 | <0.0001 |
| 0.1 µg/g x 6 µg/g   | 63.06 | 1 | <0.0001 |
| 0.1 µg/g x 8 µg/g   | 53.67 | 1 | <0.0001 |
| 0.1 µg/g x 10 µg/g  | 70.92 | 1 | <0.0001 |
| 0.5 µg/g x 1 µg/g   | 29.26 | 1 | <0.0001 |
| 0.5 µg/g x 2 µg/g   | 7.23  | 1 | 0.0072  |
| 0.5 µg/g x 4 µg/g   | 22.97 | 1 | <0.0001 |
| 0.5 µg/g x 6 µg/g   | 23.67 | 1 | <0.0001 |
| 0.5 µg/g x 8 µg/g   | 15.30 | 1 | <0.0001 |
| 0.5 µg/g x 10 µg/g  | 27.64 | 1 | <0.0001 |
| 1 µg/g x 2 µg/g     | 13.68 | 1 | 0.0002  |
| 1 µg/g x 4 µg/g     | 0.19  | 1 | 0.6606  |
| 1 µg/g x 6 µg/g     | 0.56  | 1 | 0.4533  |
| 1 µg/g x 8 µg/g     | 1.15  | 1 | 0.2836  |
| 1 µg/g x 10 µg/g    | 0.72  | 1 | 0.3955  |
| 2 µg/g x 4 µg/g     | 9.24  | 1 | 0.0024  |
| 2 µg/g x 6 µg/g     | 13.34 | 1 | 0.0003  |
| 2 µg/g x 8 µg/g     | 4.38  | 1 | 0.0363  |
| 2 µg/g x 10 µg/g    | 14.55 | 1 | 0.0001  |
| 4 µg/g x 6 µg/g     | 1.21  | 1 | 0.2707  |
| 4 µg/g x 8 µg/g     | 0.42  | 1 | 0.5186  |
| 4 µg/g x 10 µg/g    | 1.29  | 1 | 0.2554  |
| 6 µg/g x 8 µg/g     | 1.55  | 1 | 0.2132  |
| 6 µg/g x 10 µg/g    | 0.09  | 1 | 0.7705  |
| 8 µg/g x 10 µg/g    | 2.12  | 1 | 0.1455  |

---

**Table S1: B.** Result of statistical tests of three *S. littoralis* populations in bioassay 2 with 8 µg/g recombinant and natural Cry3Aa in artificial diet. Statistically significant p-values are highlighted in bold (Bonferroni correction:  $\alpha = 0.017$  in Chi-square test and Chi-square test for trend). The type of test used for each parameter and abbreviations of *S. littoralis* populations are described in section 5. Material and Methods.

| Population | Examined parameter                     | Test statistics | df    | p                        | Post-hoc test (p) <sup>1</sup>                                                                                                                                                                                                                                                                      |
|------------|----------------------------------------|-----------------|-------|--------------------------|-----------------------------------------------------------------------------------------------------------------------------------------------------------------------------------------------------------------------------------------------------------------------------------------------------|
| NRC        | Initial larval weight (mg)             | F = 1.24        | 2,113 | 0.293                    | control x recombinant Cry3Aa:<br>$\chi^2 = 0.18$ , df = 1, p = 0.668<br>control x natural Cry3Aa:<br>$\chi^2 = 0.39$ , df = 1, p = 0.532<br>recombinant Cry3Aa x natural Cry3Aa:<br>$\chi^2 = 1.03$ , df = 1, p = 0.311                                                                             |
|            | Body weight gain (mg) <sup>2</sup>     |                 |       |                          |                                                                                                                                                                                                                                                                                                     |
|            | ECI (%) <sup>3</sup>                   | F = 3.49        | 2,11  | 0.067                    |                                                                                                                                                                                                                                                                                                     |
|            | Weight increment (mg)                  | F = 9.82        | 2,113 | < <b>10<sup>-3</sup></b> |                                                                                                                                                                                                                                                                                                     |
|            | Maximal body weight (mg)               | F = 10.07       | 2,113 | < <b>10<sup>-3</sup></b> | recombinant Cry3Aa x control: < <b>10<sup>-3</sup></b><br>recombinant Cry3Aa x natural Cry3Aa: < <b>10<sup>-3</sup></b><br>recombinant Cry3Aa x control: < <b>10<sup>-3</sup></b><br>recombinant Cry3Aa x natural Cry3Aa: < <b>10<sup>-3</sup></b>                                                  |
|            | Length of fifth instar (days)          | F = 0.51        | 2,113 | 0.604                    | n. a. <sup>4</sup><br>recombinant Cry3Aa x control: <b>0.017</b><br>recombinant Cry3Aa x natural Cry3Aa: <b>0.047</b><br>recombinant Cry3Aa x control: < <b>10<sup>-3</sup></b><br>recombinant Cry3Aa x natural Cry3Aa: < <b>10<sup>-3</sup></b><br>control x natural Cry3Aa: <b>0.045</b><br>n. a. |
|            | Length of sixth instar (days)          | F = 0.124       | 2,113 | 0.883                    |                                                                                                                                                                                                                                                                                                     |
|            | Length of prepupal stage (days)        | F = 1.87        | 2,113 | 0.159                    |                                                                                                                                                                                                                                                                                                     |
|            | Larval mortality (%)                   | $\chi^2 = 6.15$ | 2     | <b>0.046</b>             |                                                                                                                                                                                                                                                                                                     |
|            | Pupal weight (mg)                      | F = 3.45        | 2,113 | <b>0.035</b>             |                                                                                                                                                                                                                                                                                                     |
|            | Length of pupal stage (days)           | F = 209.25      | 2,110 | < <b>10<sup>-3</sup></b> |                                                                                                                                                                                                                                                                                                     |
|            | Pupal mortality (%)                    | $\chi^2 = 6.66$ | 2     | <b>0.036</b>             |                                                                                                                                                                                                                                                                                                     |
|            | No. of laid eggs per female per day    | F = 0.11        | 2,46  | 0.896                    |                                                                                                                                                                                                                                                                                                     |
|            | No. of hatched eggs per female per day | F = 0.04        | 2,46  | 0.956                    |                                                                                                                                                                                                                                                                                                     |
| SE         | Initial larval weight (mg)             | F = 1.87        | 2,87  | 0.160                    | control x recombinant Cry3Aa:<br>$\chi^2 = 8.08$ , df = 1, p = <b>0.005</b>                                                                                                                                                                                                                         |
|            | Body weight gain (mg)                  |                 |       |                          |                                                                                                                                                                                                                                                                                                     |

|    |                                        |                 |      |                                                                                                                                                                          |
|----|----------------------------------------|-----------------|------|--------------------------------------------------------------------------------------------------------------------------------------------------------------------------|
|    |                                        |                 |      | control x natural Cry3Aa:<br>$\chi^2 = 9.13$ , df = 1, p = <b>0.003</b><br>recombinant Cry3Aa x natural Cry3Aa:<br>$\chi^2 = 30.18$ , df = 1, p < <b>10<sup>-3</sup></b> |
|    | ECI (%)                                | F = 1.84        | 2,11 | 0.205                                                                                                                                                                    |
|    | Weight increment (mg)                  | F = 6.96        | 2,87 | <b>0.002</b>                                                                                                                                                             |
|    | Maximal body weight (mg)               | F = 7.14        | 2,87 | <b>0.001</b>                                                                                                                                                             |
|    | Length of fifth instar (days)          | F = 7.21        | 2,87 | <b>0.001</b>                                                                                                                                                             |
|    | Length of sixth instar (days)          | F = 1.65        | 2,87 | 0.200                                                                                                                                                                    |
|    | Length of prepupal stage (days)        | F = 1.04        | 2,82 | 0.359                                                                                                                                                                    |
|    | Larval mortality (%)                   | $\chi^2 = 2.05$ | 2    | 0.358                                                                                                                                                                    |
|    | Pupal weight (mg)                      | F = 4.65        | 2,82 | <b>0.012</b>                                                                                                                                                             |
|    | Length of pupal stage (days)           | F = 2.00        | 2,79 | 0.143                                                                                                                                                                    |
|    | Pupal mortality (%)                    | $\chi^2 = 1.70$ | 2    | 0.426                                                                                                                                                                    |
|    | No. of laid eggs per female per day    | F = 0.75        | 2,26 | 0.480                                                                                                                                                                    |
|    | No. of hatched eggs per female per day | F = 0.61        | 2,26 | 0.551                                                                                                                                                                    |
| SF | Initial larval weight (mg)             | F = 0.59        | 2,93 | 0.557                                                                                                                                                                    |
|    |                                        |                 |      | control x recombinant Cry3Aa:<br>$\chi^2 = 0.74$ , df = 1, p = 0.39                                                                                                      |
|    | Body weight gain (mg)                  |                 |      | control x natural Cry3Aa:<br>$\chi^2 = 0.41$ , df = 1, p = 0.522                                                                                                         |
|    |                                        |                 |      | recombinant Cry3Aa x natural Cry3Aa:<br>$\chi^2 = 0.05$ , df = 1, p = 0.821                                                                                              |
|    | ECI (%)                                | F = 0.49        | 2,12 | 0.623                                                                                                                                                                    |
|    | Weight increase (mg)                   | F = 0.63        | 2,93 | 0.534                                                                                                                                                                    |
|    | Maximal body weight (mg)               | F = 0.64        | 2,93 | 0.532                                                                                                                                                                    |
|    | Length of fifth instar (days)          | F = 1.38        | 2,93 | 0.256                                                                                                                                                                    |
|    | Length of sixth instar (days)          | F = 0.10        | 2,93 | 0.903                                                                                                                                                                    |
|    | Length of prepupal stage (days)        | F = 1.43        | 2,93 | 0.243                                                                                                                                                                    |
|    | Larval mortality (%)                   | $\chi^2 = 1.40$ | 2    | 0.500                                                                                                                                                                    |

|                                        |                 |      |              |                                            |
|----------------------------------------|-----------------|------|--------------|--------------------------------------------|
| Pupal weight (mg)                      | F = 0.60        | 2,83 | 0.551        |                                            |
| Length of pupal stage (days)           | F = 3.99        | 2,93 | <b>0.022</b> | natural Cry3Aa x recombinant: <b>0.033</b> |
| Pupal mortality (%)                    | $\chi^2 = 2.49$ | 2    | 0.287        |                                            |
| No. of laid eggs per female per day    | F = 1.64        | 2,55 | 0.202        |                                            |
| No. of hatched eggs per female per day | F = 1.33        | 2,55 | 0.274        |                                            |

<sup>1</sup>Treatment with significantly higher value (mg, days) is stated as the first one. Results of post-hoc tests are given only for significantly different treatments;

<sup>2</sup>Body weight gain: overall Chi-square test for trend of all three treatments is not possible; <sup>3</sup>ECI: efficiency of food conversion to biomass, <sup>4</sup>n. a.: not available: all post-hoc tests were not significant. N - population of *S. littoralis* reared in our laboratory; NRC - population of *S. littoralis* obtained from National Research Centre, Egypt; CU - population of *S. littoralis* obtained from Cairo University, Egypt; SE - sensitive population of *S. littoralis* obtained from Egypt; SF - sensitive population of *S. littoralis* obtained from France.

**Table S1: C.** Result of statistical tests of five *S. littoralis* populations in bioassay 3 with Cry3Aa expressed in GM potato SNL. Statistically significant p-values are highlighted in bold. The type of test used for each parameter and abbreviations of *S. littoralis* populations are described in section 5. Material and Methods.

| Population | Examined parameter                     | Test statistics      | df   | p                  |
|------------|----------------------------------------|----------------------|------|--------------------|
| N          | Initial larval weight (mg)             | F = 1.61             | 1,34 | 0.213              |
|            | Body weight gain (mg)                  | $\chi^2 = 0.73$      | 1    | 0.392              |
|            | ECI (%) <sup>1</sup>                   | F = 0.04             | 1,8  | 0.852              |
|            | Weight increment (mg)                  | F = 0.16             | 1,34 | 0.692              |
|            | Maximal body weight (mg)               | F = 0.14             | 1,34 | 0.711              |
|            | Length of fifth instar (days)          | F = 0.52             | 1,34 | 0.476              |
|            | Length of sixth instar (days)          | F < 10 <sup>-3</sup> | 1,34 | 0.992              |
|            | Length of prepupal stage (days)        | F = 2.27             | 1,34 | 0.141              |
|            | Larval mortality (%)                   | $\chi^2 = 0.63$      | 1    | 0.426              |
|            | Pupal weight (mg)                      | F = 0.46             | 1,34 | 0.503              |
|            | Length of pupal stage (days)           | F = 0.49             | 1,34 | 0.490              |
|            | Pupal mortality (%)                    | n. a. <sup>2</sup>   |      |                    |
|            | No. of laid eggs per female per day    | F = 0.47             | 1,13 | 0.504              |
|            | No. of hatched eggs per female per day | F = 0.01             | 1,13 | 0.926              |
| NRC        | Initial larval weight (mg)             | F = 1.57             | 1,30 | 0.220              |
|            | Body weight gain (mg)                  | $\chi^2 = 11.96$     | 1    | < 10 <sup>-3</sup> |
|            | ECI (%)                                | F = 5.44             | 1,2  | 0.156              |
|            | Weight increase (mg)                   | F = 1.06             | 1,30 | 0.311              |
|            | Maximal body weight (mg)               | F = 1.02             | 1,30 | 0.322              |
|            | Length of fifth instar (days)          | n. a.                |      |                    |
|            | Length of sixth instar (days)          | F = 5.17             | 1,30 | <b>0.031</b>       |
|            | Length of prepupal stage (days)        | F = 1.60             | 1,30 | 0.216              |
|            | Larval mortality (%)                   | $\chi^2 = 1.68$      | 1    | 0.194              |
|            | Pupal weight (mg)                      | F = 0.94             | 1,30 | 0.339              |
|            | Length of pupal stage (days)           | F = 39.32            | 1,30 | < 10 <sup>-3</sup> |
|            | Pupal mortality (%)                    | n. a.                |      |                    |
|            | No. of laid eggs per female per day    | F = 1.47             | 1,10 | 0.253              |
|            | No. of hatched eggs per female per day | F = 0.17             | 1,10 | 0.690              |
| CU         | Initial larval weight (mg)             | F = 1.25             | 1,31 | 0.271              |
|            | Body weight gain (mg)                  | $\chi^2 = 1.20$      | 1    | 0.273              |
|            | ECI (%)                                | F = 0.37             | 1,6  | 0.563              |
|            | Weight increase (mg)                   | F = 0.51             | 1,31 | 0.480              |
|            | Maximal body weight (mg)               | F = 0.49             | 1,31 | 0.491              |
|            | Length of fifth instar (days)          | F = 0.43             | 1,31 | 0.515              |
|            | Length of sixth instar (days)          | F < 10 <sup>-2</sup> | 1,31 | 0.952              |
|            | Length of prepupal stage (days)        | F = 1.87             | 1,31 | 0.182              |
|            | Larval mortality (%)                   | $\chi^2 = 0.27$      | 1    | 0.602              |
|            | Pupal weight (mg)                      | F < 10 <sup>-2</sup> | 1,31 | 0.946              |
|            | Length of pupal stage (days)           | F = 3.95             | 1,31 | 0.056              |
|            | Pupal mortality (%)                    | n. a.                |      |                    |
|            | No. of laid eggs per female per day    | F = 0.99             | 1,13 | 0.340              |
|            | No. of hatched eggs per female per day | F = 4.39             | 1,13 | 0.056              |
| SE         | Initial larval weight (mg)             | F = 0.31             | 1,50 | 0.582              |
|            | Body weight gain (mg)                  | $\chi^2 = 11.94$     | 1    | < 10 <sup>-3</sup> |
|            | ECI (%)                                | F = 0.28             | 1,8  | 0.612              |

|    |                                        |                 |      |                             |
|----|----------------------------------------|-----------------|------|-----------------------------|
|    | Weight increase (mg)                   | F = 0.99        | 1,50 | 0.325                       |
|    | Maximal body weight (mg)               | F = 1.16        | 1,50 | 0.286                       |
|    | Length of fifth instar (days)          | F = 0.04        | 1,50 | 0.847                       |
|    | Length of sixth instar (days)          | F = 0.01        | 1,50 | 0.933                       |
|    | Length of prepupal stage (days)        | F = 1.81        | 1,50 | 0.185                       |
|    | Larval mortality (%)                   | $\chi^2 = 1.46$ | 1    | 0.228                       |
|    | Pupal weight (mg)                      | F = 0.41        | 1,50 | 0.527                       |
|    | Length of pupal stage (days)           | F = 13.60       | 1,49 | <b>0.001</b>                |
|    | Pupal mortality (%)                    | $\chi^2 = 0.49$ | 1    | 0.487                       |
|    | No. of laid eggs per female per day    | F = 0.01        | 1,23 | 0.910                       |
|    | No. of hatched eggs per female per day | F = 1.02        | 1,23 | 0.322                       |
| SF | Initial larval weight (mg)             | F = 1.18        | 1,54 | 0.283                       |
|    | Body weight gain (mg)                  | $\chi^2 = 9.43$ | 1    | <b>0.002</b>                |
|    | ECI (%)                                | F = 0.78        | 1,6  | 0.410                       |
|    | Weight increase (mg)                   | F = 3.63        | 1,54 | 0.062                       |
|    | Maximal body weight (mg)               | F = 3.68        | 1,54 | 0.060                       |
|    | Length of fifth instar (days)          | F = 5.02        | 1,54 | <b>0.029</b>                |
|    | Length of sixth instar (days)          | F = 2.84        | 1,54 | 0.098                       |
|    | Length of prepupal stage (days)        | F = 53.14       | 1,53 | <b>&lt; 10<sup>-3</sup></b> |
|    | Larval mortality (%)                   | $\chi^2 = 0.34$ | 1    | 0.554                       |
|    | Pupal weight (mg)                      | F = 4.00        | 1,53 | 0.051                       |
|    | Length of pupal stage (days)           | F = 6.27        | 1,31 | <b>0.018</b>                |
|    | Pupal mortality (%)                    | $\chi^2 = 6.45$ | 1    | <b>0.011</b>                |
|    | No. of laid eggs per female per day    | F = 0.82        | 1,15 | 0.379                       |
|    | No. of hatched eggs per female per day | F = 0.24        | 1,15 | 0.63                        |

<sup>1</sup>ECI: efficiency of food conversion to biomass; <sup>2</sup>n. a.: not available: no variability in data

N - population of *S. littoralis* reared in our laboratory; NRC - population of *S. littoralis* obtained from National Research Centre, Egypt; CU- population of *S. littoralis* obtained from Cairo University, Egypt; SE - sensitive population of *S. littoralis* obtained from Egypt; SF - sensitive population of *S. littoralis* obtained from France.

**S1: D.** Preparation of semi-artificial diet for *L. decemlineata* larvae (description).

Batches of 150 ml were used per a standard test of each toxin. A solution of 1.98 g agar in 70.0 ml deionized water was prepared in an autoclaved bottle in a microwave oven, cooled by adding 40.0 ml cold water, and placed on a water bath of 48–56°C. Dry diet components (21.09 g) were added under continual mixing. The bottle was closed and shaken in the water bath to achieve homogenous suspension. Formaldehyde (0.38 ml; 37 %) and potassium hydroxide (0.68 ml; 18.3 %) were added, the bottle was closed, the contents were mixed thoroughly, and divided into aliquots of 13.0 g and kept on water bath at 50–53°C. Diets containing different amounts of Cry3Aa were prepared by adding specific amounts of the Cry3Aa solution to achieve the desired concentration. The content was mixed thoroughly with a spoon and dispensed in 0.3 ml portions into wells of a titer plate (#K082248.1 from P-lab, 48 wells, well volume 1.76 ml, area 0.98 cm<sup>2</sup>). Eppendorf pipette and 1 ml tips with cut ends were used for pipetting. Plates with diet were kept in the refrigerator for not more than 2 days before use.

**S1: E.** Preparation of a semi-artificial agar bean diet for *S. littoralis* larvae (description).

500 g of small white beans cultivar Aidagold (La Food s.r.o. Česká Republika) were cooked until soft. The excess water was removed, and the beans were homogenized in a blender. The 75 g dry yeast was cooked in 300 ml distilled water and thoroughly mixed with the bean base. The soluble ingredients, namely 7.5 g ascorbic acid, 1.25 g sorbic acid and 4.75 g methylparaben were successively added into the bean base. Hot solution of 30 g agar dissolved in 500 ml water was added and the hot diet was poured into three Petri dishes (20 cm diameter). After cooling at room temperature, the dishes were stored in a refrigerator (4 °C) for up to one month.

**S1: F.** Preparation of a semi-artificial soy powder and corn bran diet for *S. littoralis* larvae (description).

50 g of agar was prepared by boiling in 1.6 l water under continuous mixing by beater for at least 5 minutes. Then it was cooled down in water bath to room temperature in sink under frequent mixing to avoid solidification of the agar on pot walls. The 840 g of dry premix (665 g soya cake, 665 g pinole, 333 g wheat germs, 250 g brewer's yeast, 26 g benzoic acid, 11.4 g nipagin, 46.8 g ascorbic acid) was poured into a blender pot together with 1.6 l of agar and homogenized. Other dry components, namely 30 g casein, 12 g Wesson salt mix, 30 g vitamin premix (833.5 g D-Glucose, 45g ascorbic acid, 5 g benzoic acid, 4.45 g nicotinic acid, 5 g inositol, 3 g DL-pantothenic acid, 2.25 g menadione, 1 g riboflavine, 1 g pyridoxine, 1 g thiamine hydrochloride, 1.8 g vitamin A acetate, 0.125 g calciferol, 0.02 g D-biotine, 0.09 g folic acid, 0.00135 g vitamin B12, 75 g choline chloride, 22 g DL  $\alpha$  tocopherol acetate), and antibiotics (0.3 g Ampiphac and 0.4 g Acti Tetra®) were added slowly. Liquid components – 8 ml linseed oil and 1.5 ml formaldehyde were added. Artificial diet was poured into three Petri dishes (20 cm diameter). The dishes were stored in a refrigerator (4 °C) for up to one month.
