# Supplementary material for: Cry3Aa Toxin Is Not Suitable to Control Lepidopteran Pest Spodoptera littoralis (Boisd.)
Source: Plants (Basel). 2022 May 15;11(10):1312. doi: 10.3390/plants11101312 (PMC9145897; doi:10.3390/plants11101312)
Supplement: Supplementary file 1 [file plants-11-01312-s001.zip › Supplementary_materials_Table_S2G-I.xls]

## Sheet: S2
Supplementary materials S2: G, H, I
Cry3Aa toxin is not suitable to control lepidopteran pests Spodoptera littoralis (Boisd.)
Oxana Skoková Habuštová, Zdeňka Svobodová, Dalibor Kodrík and František Sehnal

## Sheet: S2_G
S2: G	Original raw data of the bioassay 1 including the exact number of L. decemlineata used for statistical analyses
Recombinant Cry3Aa
	Number of living larvae of L. decemlineata fed by arteficial diet with Cry3Aa in survival analysis
	day	control	1 µg/g	2 µg/g	4 µg/g	6 µg/g	8 µg/g	10 µg/g
	1	34	37	36	38	36	37	30
	2	34	37	33	38	34	37	29
	3	34	37	33	35	29	36	27
	4	34	35	31	31	23	34	26
	5	34	33	25	25	21	22	17
	6	34	31	22	16	12	17	3
	7	34	27	15	10	3	6	0
	8	34	27	15	10	3	6	0
Natural Cry3Aa
	Number of living larvae of L. decemlineata fed by arteficial diet with Cry3Aa in survival analysis
	day	control	0.01 µg/g	0.1 µg/g	0.5 µg/g	1 µg/g	2 µg/g	4 µg/g	6 µg/g	8 µg/g	10 µg/g
	1	42	30	42	15	47	35	31	31	27	25
	2	42	30	41	15	44	35	27	31	23	24
	3	42	30	41	15	29	30	23	22	17	17
	4	42	30	41	14	17	21	12	8	12	8
	5	42	29	41	13	9	18	6	2	8	1
	6	42	28	38	10	2	10	1	1	3	0
	7	42	28	36	9	0	5	1	1	2	0
	8	42	26	24	5	0	4	0	1	1	0
GE SNL potato
	Number of living larvae of L. decemlineata fed by potato expressing Cry3Aa in survival analysis
	day	control	GE SNL
	1	40	60
	2	40	60
	3	40	49
	4	40	21
	5	40	1
	6	40	0
	7	40	0
	8	40	0

## Sheet: S2_H
S2: H	Original raw data of the bioassay 2 including the exact number of S. littoralis used for statistical analyses
NRC
	VAPOR FOR ECI (EFFICIENCY OF CONVERSION OF INGESTED MATERIALS) CALCULATION
	treatment	fresh diet [mg]	24 h old diet [mg]
	Recombinant Cry3Aa	589	376
		737	523
		812	559
		1181	952
	Control	693	495
		629	390
		1226	932
		1131	872
	Natural Cry3Aa	640	352
		840	467
		995	776
		975	712
	GROWTH OF BODY WEIGHT AND ECI (EFFICIENCY OF CONVERSION OF INGESTED MATERIALS)
		treatment	larval weight [mg]	24 h old diet [mg]	fresh diet [mg]			treatment	larval weight [mg]	24 h old diet [mg]	fresh diet [mg]			treatment	larval weight [mg]	24 h old diet [mg]	fresh diet [mg]
	day 1	Recombinant Cry3Aa	63	63	279		day 1	Control	55	135	368		day 1	Natural Cry3Aa	61	126	559
		Recombinant Cry3Aa	63	95	331			Control	62	37	178			Natural Cry3Aa	63	111	391
		Recombinant Cry3Aa	56	99	318			Control	64	212	505			Natural Cry3Aa	56	127	404
		Recombinant Cry3Aa	65	93	341			Control	59	123	410			Natural Cry3Aa	61	134	397
														Natural Cry3Aa	58	182	495
	day 2	Recombinant Cry3Aa	82	192	543		day 2	Control	90	194	502
		Recombinant Cry3Aa	96	324	513			Control	90	177	512		day 2	Natural Cry3Aa	127	277	507
		Recombinant Cry3Aa	101	223	537			Control	128	343	549			Natural Cry3Aa	118	247	590
		Recombinant Cry3Aa	119	349	588			Control	117	318	539			Natural Cry3Aa	107	221	579
														Natural Cry3Aa	112	212	512
	day 3	Recombinant Cry3Aa	184	448	666		day 3	Control	166	289	661			Natural Cry3Aa	121	264	535
		Recombinant Cry3Aa	110	322	669			Control	195	461	678
		Recombinant Cry3Aa	190	477	697			Control	156	261	664		day 3	Natural Cry3Aa	140	225	637
		Recombinant Cry3Aa	137	228	685			Control	149	159	628			Natural Cry3Aa	202	201	669
														Natural Cry3Aa	212	234	632
	day 4	Recombinant Cry3Aa	192	153	685		day 4	Control	228	204	677			Natural Cry3Aa	194	165	681
		Recombinant Cry3Aa	225	177	673			Control	212	104	644			Natural Cry3Aa	210	315	680
		Recombinant Cry3Aa	218	170	693			Control	295	97	682
		Recombinant Cry3Aa	331	0	680			Control	342	15	738		day 4	Natural Cry3Aa	235	51	658
														Natural Cry3Aa	218	190	662
	day 5	Recombinant Cry3Aa	427	68	997		day 5	Control	427	221	1130			Natural Cry3Aa	216	159	697
		Recombinant Cry3Aa	438	370	1194			Control	465	194	1163			Natural Cry3Aa	201	160	632
		Recombinant Cry3Aa	456	124	1073			Control	562	157	1007			Natural Cry3Aa	222	172	616
		Recombinant Cry3Aa	618	429	1296			Control	665	285	1243
													day 5	Natural Cry3Aa	448	180	1165
	day 6	Recombinant Cry3Aa	883	186	1095		day 6	Control	851	312	1178			Natural Cry3Aa	309	429	1206
		Recombinant Cry3Aa	843	281	980			Control	815	0	1076			Natural Cry3Aa	334	298	1225
		Recombinant Cry3Aa	929	335	1086			Control	894	413	1186			Natural Cry3Aa	330	337	1193
		Recombinant Cry3Aa	910	842	1067			Control	978	810	1105			Natural Cry3Aa	390	265	1240
	day 7	Recombinant Cry3Aa	1096				day 7	Control	1002				day 6	Natural Cry3Aa	872	400	1133
		Recombinant Cry3Aa	899					Control	1268					Natural Cry3Aa	584	1190	1233
		Recombinant Cry3Aa	930					Control	1073					Natural Cry3Aa	616	169	1187
		Recombinant Cry3Aa						Control	754					Natural Cry3Aa	598	218	1201
														Natural Cry3Aa	616	0	945
													day 7	Natural Cry3Aa	884
														Natural Cry3Aa	1048
														Natural Cry3Aa	1028
														Natural Cry3Aa	1001
														Natural Cry3Aa			13
	FITNESS PARAMETERS
	number of individuals	treatment	sex	initial larval weight [mg]	weight increment [mg]	maximal body weight [mg]	length of fifth instar [day]	length of sixth instar [day]	length of prepupal stage [day]	pupal weight [mg]		number of individuals	treatment	sex	Length of pupal stage [day]
	1	Recombinant Cry3Aa	M	63	1033	1096	3	3	3	352		1	Recombinant Cry3Aa	M	10
	2	Recombinant Cry3Aa	M	56	874	930	3	3	2	356		2	Recombinant Cry3Aa	M	11
	3	Recombinant Cry3Aa	M	65	845	910	2	3	2	282		3	Recombinant Cry3Aa	M	11
	4	Recombinant Cry3Aa	M	58	904	962	2	3	2	286		4	Recombinant Cry3Aa	M	11
	5	Recombinant Cry3Aa	M	58	967	1025	3	3	2	357		5	Recombinant Cry3Aa	M	11
	6	Recombinant Cry3Aa	M	55	1066	1121	3	3	3	376		6	Recombinant Cry3Aa	M	10
	7	Recombinant Cry3Aa	M	55	1065	1120	3	3	3	360		7	Recombinant Cry3Aa	M	10
	8	Recombinant Cry3Aa	M	62	1043	1105	3	2	3	396		8	Recombinant Cry3Aa	M	11
	9	Recombinant Cry3Aa	M	58	1047	1105	3	3	3	368		9	Recombinant Cry3Aa	M	10
	10	Recombinant Cry3Aa	M	65	947	1012	3	3	3	356		10	Recombinant Cry3Aa	M	11
	11	Recombinant Cry3Aa	M	62	1141	1203	3	2	3	422		11	Recombinant Cry3Aa	M	11
	12	Recombinant Cry3Aa	M	64	808	872	3	3	2	341		12	Recombinant Cry3Aa	M	11
	13	Recombinant Cry3Aa	M	59	947	1006	3	3	2	347		13	Recombinant Cry3Aa	M	11
	14	Recombinant Cry3Aa	M	58	1056	1114	3	2	3	358		14	Recombinant Cry3Aa	M	11
	15	Recombinant Cry3Aa	M	65	1112	1177	3	3	3	375		15	Recombinant Cry3Aa	M	10
	16	Recombinant Cry3Aa	M	65	787	852	3	2	2	279		16	Recombinant Cry3Aa	M	11
	17	Recombinant Cry3Aa	M	55	1148	1203	3	3	2	391		17	Recombinant Cry3Aa	M	11
	18	Recombinant Cry3Aa	F	63	836	899	2	4	2	317		18	Recombinant Cry3Aa	F	10
	19	Recombinant Cry3Aa	F	60	1231	1291	3	3	3	447		19	Recombinant Cry3Aa	F	10
	20	Recombinant Cry3Aa	F	55	1065	1120	3	3	2	408		20	Recombinant Cry3Aa	F	10
	21	Recombinant Cry3Aa	F	65	1257	1322	3	3	3	454		21	Recombinant Cry3Aa	F	9
	22	Recombinant Cry3Aa	F	65	1067	1132	3	2	3	402		22	Recombinant Cry3Aa	F	10
	23	Recombinant Cry3Aa	F	65	1200	1265	3	2	3	437		23	Recombinant Cry3Aa	F	10
	24	Recombinant Cry3Aa	F	55	1266	1321	3	3	3	389		24	Recombinant Cry3Aa	F	9
	25	Recombinant Cry3Aa	F	60	1225	1285	3	3	3	401		25	Recombinant Cry3Aa	F	10
	26	Recombinant Cry3Aa	F	62	1152	1214	3	3	2	426		26	Recombinant Cry3Aa	F	10
	27	Recombinant Cry3Aa	F	65	1076	1141	3	3	3	390		27	Recombinant Cry3Aa	F	9
	28	Recombinant Cry3Aa	F	65	903	968	3	3	3	365		28	Recombinant Cry3Aa	F	10
	29	Recombinant Cry3Aa	F	62	1295	1357	3	3	3	457		29	Recombinant Cry3Aa	F	10
	30	Recombinant Cry3Aa	F	55	1305	1360	3	3	3	438		30	Recombinant Cry3Aa	F	9
	31	Recombinant Cry3Aa	F	64	1095	1159	3	2	3	424		31	Recombinant Cry3Aa	F	10
	32	Recombinant Cry3Aa	F	55	1254	1309	3	3	3	408		32	Recombinant Cry3Aa	F	10
	33	Recombinant Cry3Aa	F	57	1409	1466	3	3	3	441		33	Recombinant Cry3Aa	F	9
	34	Recombinant Cry3Aa	F	61	1144	1205	3	3	3	399		34	Recombinant Cry3Aa	F	10
	35	Recombinant Cry3Aa	F	65	1088	1153	3	2	3	421		35	Recombinant Cry3Aa	F	9
	36	Recombinant Cry3Aa	F	64	1281	1345	3	3	3	449		36	Recombinant Cry3Aa	F	10
	37	Recombinant Cry3Aa	F	56	970	1026	2	3	3	372		37	Recombinant Cry3Aa	F	10
	38	Recombinant Cry3Aa	F	56	1090	1146	3	3	3	422		38	Recombinant Cry3Aa	F	10
	39	Recombinant Cry3Aa	F	55	1106	1161	3	3	3	392		39	Recombinant Cry3Aa	F	10
	40	Recombinant Cry3Aa	F	57	1001	1058	3	3	2	414		40	Recombinant Cry3Aa	F	10
	1	Control	M	55	947	1002	3	3	2	352		1	Control	M	10
	2	Control	M	64	830	894	3	2	3	334		2	Control	M	9
	3	Control	M	55	967	1022	3	3	2	378		3	Control	M	9
	4	Control	M	60	796	856	2	3	3	318		4	Control	M	10
	5	Control	M	58	1079	1137	3	3	3	342		5	Control	M	9
	6	Control	M	55	967	1022	3	3	2	356		6	Control	M	9
	7	Control	M	60	878	938	2	3	2	324		7	Control	M	9
	8	Control	M	63	1013	1076	2	3	3	371		8	Control	M	9
	9	Control	M	62	805	867	3	3	3	324		9	Control	M	10
	10	Control	M	57	665	722	3	3	2	314		10	Control	M	9
	11	Control	M	60	843	903	3	2	2	291		11	Control	M	9
	12	Control	M	61	822	883	3	3	2	342		12	Control	M	9
	13	Control	M	63	895	958	3	3	3	319		13	Control	M	10
	14	Control	M	55	656	711	3	3	3	263		14	Control	M	9
	15	Control	M	63	731	794	2	3	3	341		15	Control	M	9
	16	Control	M	55	894	949	3	2	3	341		16	Control	M	9
	17	Control	M	61	730	791	2	3	3	279		17	Control	M	9
	18	Control	M	56	854	910	3	3	2	336		18	Control	M	10
	19	Control	M	65	728	793	2	3	3	314		19	Control	M	9
	20	Control	F	57	1211	1268	3	3	2	456		20	Control	F	9
	21	Control	F	62	1011	1073	3	3	2	372		21	Control	F	9
	22	Control	F	56	1288	1344	3	3	3	409		22	Control	F	8
	23	Control	F	57	1168	1225	3	3	4	402		23	Control	F	8
	24	Control	F	56	1191	1247	3	3	2	445		24	Control	F	9
	25	Control	F	55	1132	1187	3	3	3	420		25	Control	F	8
	26	Control	F	65	1214	1279	3	2	3	463		26	Control	F	8
	27	Control	F	57	1092	1149	3	3	2	395		27	Control	F	8
	28	Control	F	57	1014	1071	3	3	2	380		28	Control	F	8
	29	Control	F	61	1056	1117	3	3	2	404		29	Control	F	8
	30	Control	F	65	1006	1071	3	2	3	405		30	Control	F	8
	31	Control	F	58	1166	1224	3	3	3	418		31	Control	F	8
	32	Control	F	56	1273	1329	3	3	2	442		32	Control	F	8
	33	Control	F	62	1188	1250	3	3	3	454		33	Control	F	9
	34	Control	F	59	797	856	3	3	2	376		34	Control	F	9
	35	Control	F	56	693	749	3	3	4	295		35	Control	F	8
	36	Control	F	62	956	1018	3	3	2	402		36	Control	F	8
	37	Control	F	60	866	926	3	2	3	375		37	Control	F	8
	38	Control	F	60	916	976	3	3	2	383		38	Control	F	8
	39	Control	F	60	758	818	3	3	2	302		39	Control	F	8
	40	Control	F	55	903	958	3	3	3	298		40	Control	F	8
	1	Natural Cry3Aa	M	61	823	884	2	4	2	325		1	Natural Cry3Aa	M	9
	2	Natural Cry3Aa	M	56	972	1028	3	3	2	333		2	Natural Cry3Aa	M	9
	3	Natural Cry3Aa	M	59	889	948	3	3	2	370		3	Natural Cry3Aa	M	9
	4	Natural Cry3Aa	M	57	972	1029	2	3	2	317		4	Natural Cry3Aa	M	9
	5	Natural Cry3Aa	M	64	1004	1068	3	3	2	365		5	Natural Cry3Aa	M	9
	6	Natural Cry3Aa	M	60	896	956	3	2	3	349		6	Natural Cry3Aa	M	9
	7	Natural Cry3Aa	M	62	779	841	3	3	2	329		7	Natural Cry3Aa	M	9
	8	Natural Cry3Aa	M	60	860	920	3	3	2	336		8	Natural Cry3Aa	M	9
	9	Natural Cry3Aa	M	62	783	845	3	3	2	314		9	Natural Cry3Aa	M	9
	10	Natural Cry3Aa	M	57	1025	1082	3	2	3	375		10	Natural Cry3Aa	M	9
	11	Natural Cry3Aa	M	58	716	774	3	3	2	315		11	Natural Cry3Aa	M	9
	12	Natural Cry3Aa	M	55	846	901	3	3	2	362		12	Natural Cry3Aa	M	9
	13	Natural Cry3Aa	M	65	1080	1145	3	2	3	404		13	Natural Cry3Aa	M	9
	14	Natural Cry3Aa	M	56	742	798	3	3	2	343		14	Natural Cry3Aa	M	9
	15	Natural Cry3Aa	M	65	834	899	3	2	3	322		15	Natural Cry3Aa	M	9
	16	Natural Cry3Aa	M	56	773	829	3	3	2	349		16	Natural Cry3Aa	M	9
	17	Natural Cry3Aa	M	55	996	1051	3	3	2	363		17	Natural Cry3Aa	M	8
	18	Natural Cry3Aa	M	55	932	987	3	2	3	365		18	Natural Cry3Aa	F	8
	19	Natural Cry3Aa	F	63	985	1048	3	3	3	398		19	Natural Cry3Aa	F	8
	20	Natural Cry3Aa	F	61	940	1001	3	3	3	343		20	Natural Cry3Aa	F	8
	21	Natural Cry3Aa	F	58	850	908	3	3	2	364		21	Natural Cry3Aa	F	8
	22	Natural Cry3Aa	F	64	937	1001	3	3	3	404		22	Natural Cry3Aa	F	8
	23	Natural Cry3Aa	F	62	911	973	3	3	2	387		23	Natural Cry3Aa	F	8
	24	Natural Cry3Aa	F	63	1005	1068	3	3	2	359		24	Natural Cry3Aa	F	8
	25	Natural Cry3Aa	F	59	1352	1411	3	3	3	465		25	Natural Cry3Aa	F	8
	26	Natural Cry3Aa	F	55	1264	1319	3	3	2	426		26	Natural Cry3Aa	F	8
	27	Natural Cry3Aa	F	57	816	873	3	3	2	340		27	Natural Cry3Aa	F	8
	28	Natural Cry3Aa	F	55	872	927	3	3	3	376		28	Natural Cry3Aa	F	8
	29	Natural Cry3Aa	F	55	965	1020	3	3	3	380		29	Natural Cry3Aa	F	8
	30	Natural Cry3Aa	F	64	1111	1175	3	3	3	424		30	Natural Cry3Aa	F	8
	31	Natural Cry3Aa	F	55	1171	1226	3	3	3	404		31	Natural Cry3Aa	F	8
	32	Natural Cry3Aa	F	60	892	952	3	3	2	341		32	Natural Cry3Aa	F	9
	33	Natural Cry3Aa	F	65	918	983	2	3	3	360		33	Natural Cry3Aa	F	8
	34	Natural Cry3Aa	F	63	1106	1169	3	2	3	399		34	Natural Cry3Aa	F	8
	35	Natural Cry3Aa	F	58	661	719	3	3	2	277
	36	Natural Cry3Aa	F	55	1162	1217	3	3	3	436
	37	Natural Cry3Aa	F	55	1153	1208	3	3	3	431
	ADULTS
		day 1				day 2				day 3				day 4				day 5				day 6				day 7				day 8				day 9				day 10				day 11				day 12
	treatment	no of eggs	hatched	female death		no of eggs	hatched	female death		no of eggs	hatched	female death		no of eggs	hatched	female death		no of eggs	hatched	female death		no of eggs	hatched	female death		no of eggs	hatched	female death		no of eggs	hatched	female death		no of eggs	hatched	female death		no of eggs	hatched	female death		no of eggs	hatched	female death		no of eggs	hatched	female death
	Recombinant Cry3Aa													487	64			368	36			824	468			270	167			395	240			305	191			207	106			170	39			15	0
	Recombinant Cry3Aa													952	513			376	340			349	277			292	156			62	20			225	77			59	0
	Recombinant Cry3Aa																	995	69			458	256			481	446			343	287			287	177			177	98
	Recombinant Cry3Aa																																					21	0			204	0			94	0
	Recombinant Cry3Aa																					1765	1219			278	110			702	504			279	101			175	2			81	0			129	0
	Recombinant Cry3Aa																	30	0			64	0			178	76			211	0			208	0			307	0			127	0			40	0
	Recombinant Cry3Aa													244	48			447	18			512	341			369	186			630	506			311	226			266	167			291	209			131	57
	Recombinant Cry3Aa													389	204			238	146			1142	872			317	304			606	584			399	378			246	219			166	138			152	37
	Recombinant Cry3Aa													81	31			264	28			637	55			422	158			266	101			38	3			114	0			120	0			74	0
	Recombinant Cry3Aa																	12	0			0	0			4	1			187	0			675	0			232	0			211	0			107	0
	Recombinant Cry3Aa																	393	0			180	0			115	0			186	0			121	0			36	0			237	0			26	0
	Recombinant Cry3Aa																	557	18			1163	903			480	463			520	422			166	59			52	0			361	231			117	47
	Recombinant Cry3Aa																	1146	858			501	494			559	542			651	637			362	347			284	241			215	144			157	42
	Recombinant Cry3Aa																	7	3			796	6			99	6			184	2			0	0			98	0			20	0
	Recombinant Cry3Aa													425	65			483	453			434	405			417	386			499	329			208	132							16	0			184	0
	Control	305	139			350	148			295	60			427	334			262	180			164	6			240	98			259	0			122	0			0	0			27	0
	Control					353	341			290	212			480	26			347	224			167	10			375	0			434	0			121	0			195	0			228	0
	Control									362	224			565	161			61	25			23	1			103	44			2	0			0	0			3	0
	Control					336	297			676	440			441	338			358	287			337	294			346	320			55	15			187	74			66	4			5	0
	Control													1244	637			448	342			237	136			279	224			169	32			0	0			67	0
	Control									589	342			738	440			531	493			503	461			427	411			178	61			171	118			128	12			31	0
	Control					1038	55			676	6			488	460			507	476			433	404			348	337			297	98			127	0
	Control					1116	16			495	410			679	606			367	288			312	230			140	30			41	2			147	0			54	0			33	0
	Control									51	3			969	83			225	103			188	125			215	142			48	2			108	0			82	0			120	0
	Control									714	92			294	259			598	570			552	527			444	416			30	15			31	14			112	15
	Control									454	64			148	52			35	17			127	50			22	0			0	0			35	0
	Control													17	0			198	118
	Control									280	226			650	608			503	450													KO
	Control													557	2			601	0			415	284			268	51			309	163			167	83			168	27			165	30
	Control					450	266			771	272			551	305			509	451			417	355			178	92			51	0			81	0
	Control									43	0			21	0			160	100			155	95			78	0			117	0			43	0			98	0			30	3
	Natural Cry3Aa					657	201			323	70			511	459			327	179			487	455			328	304			247	225			156	113			118	58			68	5
	Natural Cry3Aa									1449	955			368	176			240	109			0	0			77	3			34	3
	Natural Cry3Aa					559	176			450	113			360	303			240	177			275	129			265	67			89	24			50	0			74	0			51	0
	Natural Cry3Aa									240	94			475	77			187	112			156	14			47	4			117	5			31	0			150	0			75	0
	Natural Cry3Aa									532	250			507	140			669	353			242	174			298	228			201	168			158	105			155	108			107	69
	Natural Cry3Aa													69	0			19	8			143	0			557	423			57	12			13	0			20	0
	Natural Cry3Aa									1244	978			342	237			690	314			462	319			406	293			175	75			100	12			90	8			47	47
	Natural Cry3Aa													1004	22							469	222			524	241			567	510			201	94			249	103			180	93
	Natural Cry3Aa	418	75							1352	93			392	221			406	288			603	373			180	92			137	120			113	0			8	0			49	0
	Natural Cry3Aa									420	169			156	56							33	8			47	0			39	0			0	0			0	0			7	0
	Natural Cry3Aa									608	14			431	249			583	426			561	463			327	111			288	27			192	95			85	5			32	0
	Natural Cry3Aa													850	147			586	280			277	153			382	288			57	6			273	199			188	57
	Natural Cry3Aa									1312	257			554	550			531	489			521	494			369	312			170	30			85	5			95	0			64	0
	Natural Cry3Aa									76	18			414	112			709	484			658	560			434	378			128	57			188	12			119	22			137	20
	Natural Cry3Aa					438	169			396	114			433	214			107	61			168	32			72	2			51	1			0	0			0	0			19	0
	Natural Cry3Aa																					13	0			0	0			0	0			0	0			0	0			62	0			240	0
SE
	VAPOR FOR ECI (EFFICIENCY OF CONVERSION OF INGESTED MATERIALS) CALCULATION
		fresh diet [mg]	24 h old diet [mg]
	Recombinant Cry3Aa	678	412
		728	450
		694	516
		1020	826
		879	658
		1213	942
	Control	515	219
		628	380
		666	458
		1003	762
		703	341
		1146	762
		520	203
		537	256
		698	481
		1346	1085
		795	396
		1053	683
	Natural Cry3Aa	719	422
		719	422
		636	355
		636	440
		1293	1089
		934	556
		1116	650
	GROWTH OF BODY WEIGHT AND ECI (EFFICIENCY OF CONVERSION OF INGESTED MATERIALS)
		treatment	larval weight [mg]	24 h old diet [mg]	fresh diet [mg]			treatment	larval weight [mg]	24 h old diet [mg]	fresh diet [mg]			treatment	larval weight [mg]	24 h old diet [mg]	fresh diet [mg]
	day 1	Recombinant Cry3Aa	65	63	309		day 1	Control	57	80	321		day 1	Natural Cry3Aa	59	111	370
		Recombinant Cry3Aa	62	60	301			Control	65	145	412			Natural Cry3Aa	64	93	330
		Recombinant Cry3Aa	58	52	315			Control	62	112	356			Natural Cry3Aa	55	133	397
		Recombinant Cry3Aa	59	94	310			Control	57	88	325			Natural Cry3Aa	60	79	334
		Recombinant Cry3Aa	55	62	291			Control	65	142	371			Natural Cry3Aa	61	94	389
	day 2	Recombinant Cry3Aa	91	363	582		day 2	Control	106	405	600		day 2	Natural Cry3Aa	83	197	590
		Recombinant Cry3Aa	112	289	507			Control	135	424	646			Natural Cry3Aa	113	318	609
		Recombinant Cry3Aa	107	398	617			Control	116	327	498			Natural Cry3Aa	105	239	519
		Recombinant Cry3Aa	79	190	523			Control	107	394	589			Natural Cry3Aa	84	225	571
		Recombinant Cry3Aa	89	222	545			Control	105	220	567			Natural Cry3Aa	105	289	536
	day 3	Recombinant Cry3Aa	114	279	761		day 3	Control	130	148	599		day 3	Natural Cry3Aa	139	490	737
		Recombinant Cry3Aa	134	140	536			Control	176	177	673			Natural Cry3Aa	137	203	592
		Recombinant Cry3Aa	129	269	739			Control	132	253	693			Natural Cry3Aa	103	223	598
		Recombinant Cry3Aa	124	371	693			Control	137	242	750			Natural Cry3Aa	155	315	603
		Recombinant Cry3Aa	165		553			Control	232	215	565			Natural Cry3Aa	123	172	585
	day 4	Recombinant Cry3Aa	207	262	915		day 4	Control	300	365	1146		day 4	Natural Cry3Aa	162	185	832
		Recombinant Cry3Aa	194	285	1071			Control	322	369	1202			Natural Cry3Aa	220	107	824
		Recombinant Cry3Aa	240	321	1161			Control	238	431	1005			Natural Cry3Aa	202	259	913
		Recombinant Cry3Aa	141		1009			Control	319	284	1090			Natural Cry3Aa	180	149	719
		Recombinant Cry3Aa						Control	311		877			Natural Cry3Aa	207	151	886
	day 5	Recombinant Cry3Aa	500	225	994		day 5	Control	658	346	972		day 5	Natural Cry3Aa	308	176	980
		Recombinant Cry3Aa	574	115	913			Control	666	258	950			Natural Cry3Aa	524	111	901
		Recombinant Cry3Aa	640	71	903			Control	444		1010			Natural Cry3Aa	487	130	910
		Recombinant Cry3Aa						Control	683	254	923			Natural Cry3Aa	390	168	986
		Recombinant Cry3Aa						Control						Natural Cry3Aa	423	138	983
	day 6	Recombinant Cry3Aa	841	393	1022		day 6	Control	837	726	1332		day 6	Natural Cry3Aa	401	201	1231
		Recombinant Cry3Aa	853	594	1265			Control	845	1023	1287			Natural Cry3Aa	571	242	1203
		Recombinant Cry3Aa	958	637	1228			Control						Natural Cry3Aa	588	351	1153
		Recombinant Cry3Aa						Control	853	0	1229			Natural Cry3Aa	494	257	1201
		Recombinant Cry3Aa						Control						Natural Cry3Aa	611		1111
							day 7	Control	980				day 7	Natural Cry3Aa	520
								Control						Natural Cry3Aa	614
								Control						Natural Cry3Aa	710
								Control						Natural Cry3Aa	679
								Control						Natural Cry3Aa
	FITNESS PARAMETERS
	number of individuals	treatment	sex	initial larval weight [mg]	weight increment [mg]	maximal body weight [mg]	length of fifth instar [day]	length of sixth instar [day]		number of individuals	treatment	sex	length of prepupal stage [day]	pupal weight [mg]		number of individuals	treatment	sex	Length of pupal stage [day]
	1	Recombinant Cry3Aa	M	65	776	841	2	3		1	Recombinant Cry3Aa	M	3	306		1	Recombinant Cry3Aa	M	9
	2	Recombinant Cry3Aa	M	62	791	853	2	3		2	Recombinant Cry3Aa	M	3	321		2	Recombinant Cry3Aa	M	9
	3	Recombinant Cry3Aa	M	57	731	788	3	2		3	Recombinant Cry3Aa	M	2	278		3	Recombinant Cry3Aa	M	9
	4	Recombinant Cry3Aa	M	59	753	812	2	3		4	Recombinant Cry3Aa	M	2	278		4	Recombinant Cry3Aa	M	9
	5	Recombinant Cry3Aa	M	61	841	902	2	3		5	Recombinant Cry3Aa	M	3	321		5	Recombinant Cry3Aa	M	9
	6	Recombinant Cry3Aa	M	62	636	698	3	2		6	Recombinant Cry3Aa	M	2	234		6	Recombinant Cry3Aa	M	9
	7	Recombinant Cry3Aa	M	65	691	756	2	3		7	Recombinant Cry3Aa	M	4	233		7	Recombinant Cry3Aa	M	7
	8	Recombinant Cry3Aa	M	60	567	627	2	4		8	Recombinant Cry3Aa	M	3	234		8	Recombinant Cry3Aa	M	10
	9	Recombinant Cry3Aa	M	62	922	984	2	3		9	Recombinant Cry3Aa	M	3	344		9	Recombinant Cry3Aa	M	9
	10	Recombinant Cry3Aa	M	60	799	859	2	3		10	Recombinant Cry3Aa	M	2	276		10	Recombinant Cry3Aa	M	9
	11	Recombinant Cry3Aa	M	56	745	801	2	3		11	Recombinant Cry3Aa	M	2	291		11	Recombinant Cry3Aa	M	9
	12	Recombinant Cry3Aa	M	63	737	800	2	3		12	Recombinant Cry3Aa	M	2	246		12	Recombinant Cry3Aa	M	9
	13	Recombinant Cry3Aa	M	55	755	810	2	3		13	Recombinant Cry3Aa	M	2	266		13	Recombinant Cry3Aa	M	9
	14	Recombinant Cry3Aa	M	56	726	782	3	3		14	Recombinant Cry3Aa	M	3	265		14	Recombinant Cry3Aa	M	9
	15	Recombinant Cry3Aa	F	58	900	958	2	3		15	Recombinant Cry3Aa	F	3	356		15	Recombinant Cry3Aa	F	7
	16	Recombinant Cry3Aa	F	58	807	865	2	4		16	Recombinant Cry3Aa	F	2	351		16	Recombinant Cry3Aa	F	7
	17	Recombinant Cry3Aa	F	65	718	783	2	3		17	Recombinant Cry3Aa	F	3	311		17	Recombinant Cry3Aa	F	7
	18	Recombinant Cry3Aa	F	56	908	964	2	4		18	Recombinant Cry3Aa	F	2	344		18	Recombinant Cry3Aa	F	7
	19	Recombinant Cry3Aa	F	61	673	734	2	3		19	Recombinant Cry3Aa	F	2	260		19	Recombinant Cry3Aa	F	8
	20	Recombinant Cry3Aa	F	57	759	816	2	3		20	Recombinant Cry3Aa	F	3	317		20	Recombinant Cry3Aa	F	8
	21	Recombinant Cry3Aa	F	64	894	958	2	4		21	Recombinant Cry3Aa	F	2	356		21	Recombinant Cry3Aa	F	8
	22	Recombinant Cry3Aa	F	60	741	801	2	3		22	Recombinant Cry3Aa	F	3	326		22	Recombinant Cry3Aa	F	7
	23	Recombinant Cry3Aa	F	55	793	848	2	3		23	Recombinant Cry3Aa	F	2	277		23	Recombinant Cry3Aa	F	8
	24	Recombinant Cry3Aa	F	60	920	980	2	4		24	Recombinant Cry3Aa	F	2	363		24	Recombinant Cry3Aa	F	7
	25	Recombinant Cry3Aa	F	58	1056	1114	2	3		25	Recombinant Cry3Aa	F	2	326		25	Recombinant Cry3Aa	F	8
	26	Recombinant Cry3Aa	F	55	1032	1087	3	3		26	Recombinant Cry3Aa	F	2	345		26	Recombinant Cry3Aa	F	8
	27	Recombinant Cry3Aa	F	61	932	993	3	3		27	Recombinant Cry3Aa	F	2	381		27	Recombinant Cry3Aa	F	7
	1	Control	M	57	796	853	2	3		1	Control	M	2	259		1	Control	M	10
	2	Control	M	57	797	854	3	3		2	Control	M	2	324		2	Control	M	9
	3	Control	M	63	655	718	3	3		3	Control	M	3	290		3	Control	M	9
	4	Control	M	59	799	858	2	3		4	Control	M	2	264		4	Control	M	9
	5	Control	M	61	675	736	2	3		5	Control	M	3	318		5	Control	M	9
	6	Control	M	65	630	695	2	3		6	Control	M	3	296		6	Control	M	9
	7	Control	M	60	900	960	3	3		7	Control	M	3	331		7	Control	M	9
	8	Control	M	60	888	948	2	3		8	Control	M	2	273		8	Control	M	9
	9	Control	M	59	794	853	2	3		9	Control	M	2	281		9	Control	M	9
	10	Control	M	62	698	760	3	2		10	Control	M	3	316		10	Control	M	9
	11	Control	M	65	706	771	2	3		11	Control	M	3	288		11	Control	M	9
	12	Control	M	57	991	1048	3	3		12	Control	M	2	397		12	Control	M	9
	13	Control	M	55	807	862	3	3		13	Control	M	2	324		13	Control	M	9
	14	Control	M	55	683	738	3	3		14	Control	M	2	318		14	Control	M	9
	15	Control	M	56	726	782	2	3		15	Control	M	3	289		15	Control	M	9
	16	Control	M	55	1001	1056	3	3		16	Control	M	2	370		16	Control	F	8
	17	Control	F	57	861	918	3	3		17	Control	F	3	326		17	Control	F	8
	18	Control	F	58	848	906	2	4		18	Control	F	3	342		18	Control	F	8
	19	Control	F	64	900	964	2	3		19	Control	F	3	373		19	Control	F	8
	20	Control	F	56	748	804	3	3		20	Control	F	2	328		20	Control	F	7
	21	Control	F	55	927	982	3	2		21	Control	F	3	368		21	Control	F	8
	22	Control	F	64	775	839	3	3		22	Control	F	2	361		22	Control	F	8
	23	Control	F	55	884	939	3	3		23	Control	F	3	377		23	Control	F	8
	24	Control	F	65	847	912	2	3		24	Control	F	2	268		24	Control	F	8
	25	Control	F	55	984	1039	3	3		25	Control	F	3	370		25	Control	F	8
	26	Control	F	59	890	949	3	3		26	Control	F	3	381		26	Control	F	7
	27	Control	F	55	780	835	2	3		27	Control	F	2	258		27	Control	F	8
	28	Control	F	55	928	983	3	2		28	Control	F	3	399		28	Control	F	8
	29	Control	F	62	923	985	2	3		29	Control	F	2	309		29	Control	F	8
	30	Control	F	55	1005	1060	3	3		30	Control	F	2	375		30	Control	F	8
	31	Control	F	61	758	819	3	3		31	Control	F	3	345		1	Natural Cry3Aa	M	9
	32	Control	F	53	817	870	3	3		32	Control	F	2	352		2	Natural Cry3Aa	M	9
	1	Natural Cry3Aa	M	61	550	611	2	3		1	Natural Cry3Aa	M	3	282		3	Natural Cry3Aa	M	9
	2	Natural Cry3Aa	M	61	656	717	2	3		2	Natural Cry3Aa	M	4	237		4	Natural Cry3Aa	M	9
	3	Natural Cry3Aa	M	60	567	627	2	3		3	Natural Cry3Aa	M	2	265		5	Natural Cry3Aa	M	9
	4	Natural Cry3Aa	M	58	643	701	3	3		4	Natural Cry3Aa	M	3	204		6	Natural Cry3Aa	M	7
	5	Natural Cry3Aa	M	58	884	942	2	3		5	Natural Cry3Aa	M	2	330		7	Natural Cry3Aa	M	9
	6	Natural Cry3Aa	M	57	645	702	2	4		6	Natural Cry3Aa	M	3	339		8	Natural Cry3Aa	M	9
	7	Natural Cry3Aa	M	55	793	848	3	3		7	Natural Cry3Aa	M	4	289		9	Natural Cry3Aa	M	9
	8	Natural Cry3Aa	M	56	803	859	2	3		8	Natural Cry3Aa	M	3	285		10	Natural Cry3Aa	F	8
	9	Natural Cry3Aa	M	64	604	668	2	4		9	Natural Cry3Aa	M	2	344		11	Natural Cry3Aa	F	8
	10	Natural Cry3Aa	M	57	756	813	2	3		10	Natural Cry3Aa	M	2	288		12	Natural Cry3Aa	F	8
	11	Natural Cry3Aa	M	63	635	698	2	4		11	Natural Cry3Aa	F	2	250		13	Natural Cry3Aa	F	8
	12	Natural Cry3Aa	M	57	547	604	3	3		12	Natural Cry3Aa	F	2	295		14	Natural Cry3Aa	F	7
	13	Natural Cry3Aa	M	60	950	1010	2	4		13	Natural Cry3Aa	F	2	283		15	Natural Cry3Aa	F	8
	14	Natural Cry3Aa	M	55	775	830	3	3		14	Natural Cry3Aa	F	2	289		16	Natural Cry3Aa	F	10
	15	Natural Cry3Aa	M	55	626	681	3	3		15	Natural Cry3Aa	F	4	226		17	Natural Cry3Aa	F	8
	16	Natural Cry3Aa	F	59	461	520	3	3		16	Natural Cry3Aa	F	3	396		18	Natural Cry3Aa	F	8
	17	Natural Cry3Aa	F	64	550	614	2	4		17	Natural Cry3Aa	F	1	352		19	Natural Cry3Aa	F	9
	18	Natural Cry3Aa	F	55	655	710	2	4		18	Natural Cry3Aa	F	3	334		20	Natural Cry3Aa	F	8
	19	Natural Cry3Aa	F	60	619	679	3	3		19	Natural Cry3Aa	F	3	294		21	Natural Cry3Aa	F	8
	20	Natural Cry3Aa	F	56	444	500	3	3		20	Natural Cry3Aa	F	2	160		22	Natural Cry3Aa	F	7
	21	Natural Cry3Aa	F	55	954	1009	3	3		21	Natural Cry3Aa	F	3	321		23	Natural Cry3Aa	F	8
	22	Natural Cry3Aa	F	56	1045	1101	3	3		22	Natural Cry3Aa	F	3	354		24	Natural Cry3Aa	F	8
	23	Natural Cry3Aa	F	57	692	749	3	2		23	Natural Cry3Aa	F	4	292		25	Natural Cry3Aa	F	7
	24	Natural Cry3Aa	F	60	595	655	2	3		24	Natural Cry3Aa	F	3	308		26	Natural Cry3Aa	F	8
	25	Natural Cry3Aa	F	55	253	308	3	3		25	Natural Cry3Aa	F	2	338
	26	Natural Cry3Aa	F	57	929	986	3	3		26	Natural Cry3Aa	F	3	357
	27	Natural Cry3Aa	F	55	932	987	3	3		27	Natural Cry3Aa	F	2	362
	28	Natural Cry3Aa	F	59	819	878	3	2
	29	Natural Cry3Aa	F	62	917	979	3	3
	30	Natural Cry3Aa	F	55	757	812	3	3
	31	Natural Cry3Aa	F	55	888	943	3	3
	32	Natural Cry3Aa	F	59	766	825	3	3
	ADULTS
	treatment	no of eggs	hatched	female death		no of eggs	hatched	female death		no of eggs	hatched	female death		no of eggs	hatched	female death		no of eggs	hatched	female death		no of eggs	hatched	notes		no of eggs	hatched	female death		no of eggs	hatched	female death		no of eggs	hatched	female death		no of eggs	hatched	female death		no of eggs	hatched	female death		no of eggs	hatched	female death
	Recombinant Cry3Aa	1394	1360			658	635			384	376			360	348			374	362			201	194	KO
	Recombinant Cry3Aa	522	446			800	766			223	197			166	133			168	144			127	106			89	70			59	7	KO
	Recombinant Cry3Aa	1609	1583			1032	964			506	503			335	327			208	202			154	111			82	56			56	29
	Recombinant Cry3Aa	181	100			83	40			94	33			166	0			208	105			231	0			180	79			61	60			92	0			141	2	KO		58	6	KO
	Recombinant Cry3Aa	624	573			958	857			539	525			321	319			265	263			294	288			49	33			32	2					KO
	Recombinant Cry3Aa	16	6			49	0			47	0			340	237			162	73			289	282			189	175			187	180			163	131			238	216	KO				KO
	Recombinant Cry3Aa	886	879			952	952			368	368			444	443			266	263			182	177			95	80	KO
	Recombinant Cry3Aa									435	222			165	82			268	128			199	138			158	115			39	9			22	3											4	0
	Recombinant Cry3Aa					631	617			380	373			320	288			333	323			260	247			142	111			175	132					KO
	Recombinant Cry3Aa					798	737			380	341			392	390			340	333			306	291			209	204			127	107							67	54	KO				KO
	Natural Cry3Aa													5	1			2	0							12	0			111	0			354	0			326	19			92	0			69	0
	Natural Cry3Aa	568	558			896	893			464	463			369	368			323	320			89	88			78	73			54	49					KO
	Natural Cry3Aa					26	14			1048	898			334	273			397	333			221	195			107	70			202	147			91	64					KO				KO
	Natural Cry3Aa																	4	0							14	7			10	8							31	0
	Natural Cry3Aa					1035	1017			413	409			321	313			216	215			129	125			167	162			98	35			26	0	KO
	Natural Cry3Aa									998	977			411	386			284	277			276	271			327	316			249	231			199	167			83	71	KO		11	3	KO
	Natural Cry3Aa					985	874			707	667			392	365			289	260			287	244			143	106			107	61	KO
	Natural Cry3Aa													270	243			350	243			264	189			260	177			271	217			166	115			147	90	KO				KO
	Natural Cry3Aa									492	486			242	240			213	203			143	140			145	137			103	93			37	14	KO
	Control					1117	975			463	461			986	979			263	259			159	155			322	318			133	101			67	13			61	24	KO				KO
	Control													15	9			11	3											8	3			18	0
	Control	368	348			586	0			403	400			248	245			153	152			116	116			172	170			93	93			61	55	KO
	Control									483	475													KO
	Control	721	706			504	499			540	538			667	665			277	268			192	179			121	117			20	12					KO
	Control	461	328			730	591			468	444			296	264			281	231			249	207			217	172			123	89			67	48					KO				KO
	Control	60	20			38	26			22	20			215	123			603	0			208	0			113	34			23	9					KO
	Control					985	978			192	187			351	350			220	220			127	126			299	298			161	155			153	151	KO
	Control					1077	917			305	194			547	404			377	279			170	90			251	180			168	95			105	52			23	8	KO				KO
	Control					1258	1204			648	648			148	146			364	363			249	247			210	208			116	103			62	25			36	19	KO				KO
SF
	VAPOR FOR ECI (EFFICIENCY OF CONVERSION OF INGESTED MATERIALS) CALCULATION
	treatment		fresh diet [mg]	24 h old diet [mg]
	Recombinant Cry3Aa	smaller	278	79
			357	104
			497	210
			383	140
			646	296
			625	306
		bigger	1053	561
			984	581
			1259	1021
			1421	1176
			1224	783
	Control	smaller	485	155
			342	95
			469	199
			465	197
			743	371
			613	268
		bigger	1062	581
			1069	859
			991	489
			1039	833
			1329	879
	Natural Cry3Aa	smaller	244	67
			313	85
			526	276
			488	210
			570	227
			654	375
		bigger	1066	587
			881	528
			1335	1084
			1120	904
			1207	780
	GROWTH OF BODY WEIGHT AND ECI (EFFICIENCY OF CONVERSION OF INGESTED MATERIALS)
		treatment	larval weight [mg]	24 h old diet [mg]	fresh diet [mg]			treatment	larval weight [mg]	24 h old diet [mg]	fresh diet [mg]			treatment	larval weight [mg]	24 h old diet [mg]	fresh diet [mg]
	day 1	Recombinant Cry3Aa	62	76	357		day 1	Control	65	51	281		day 1	Natural Cry3Aa	65	69	385
		Recombinant Cry3Aa	65	67	354			Control	65	65	367			Natural Cry3Aa	69	69	326
		Recombinant Cry3Aa	65	53	292			Control	58	54	291			Natural Cry3Aa	60	61	299
		Recombinant Cry3Aa	52	79	340			Control	52	63	323			Natural Cry3Aa	49	58	292
		Recombinant Cry3Aa	60	53	321			Control	63	57	317			Natural Cry3Aa	64	70	346
	day 2	Recombinant Cry3Aa	70	199	454		day 2	Control	79	159	438		day 2	Natural Cry3Aa	95	183	456
		Recombinant Cry3Aa	85	177	447			Control	100	147	435			Natural Cry3Aa	85	198	462
		Recombinant Cry3Aa	81	148	403			Control	75	126	412			Natural Cry3Aa	75	99	405
		Recombinant Cry3Aa	58	79	394			Control	82	139	434			Natural Cry3Aa	58	110	392
		Recombinant Cry3Aa	82	0	414			Control	72	134	402			Natural Cry3Aa	86	133	418
	day 3	Recombinant Cry3Aa	71	207	661		day 3	Control	89	157	536		day 3	Natural Cry3Aa	101	129	574
		Recombinant Cry3Aa	87	140	612			Control	118	135	600			Natural Cry3Aa	76	267	765
		Recombinant Cry3Aa	83	212	697			Control	98	166	608			Natural Cry3Aa	113	257	630
		Recombinant Cry3Aa	104	243	635			Control	77	155	589			Natural Cry3Aa	98	174	518
		Recombinant Cry3Aa	96	130	581			Control	88	155	616			Natural Cry3Aa	98	148	622
	day 4	Recombinant Cry3Aa	116	294	1055		day 4	Control	121	183	1020		day 4	Natural Cry3Aa	166	95	1008
		Recombinant Cry3Aa	155	124	946			Control	201	96	982			Natural Cry3Aa	147	124	935
		Recombinant Cry3Aa	157	109	984			Control	150	227	997			Natural Cry3Aa	122	268	1006
		Recombinant Cry3Aa	129	166	947			Control	131	238	1032			Natural Cry3Aa	114	251	1039
		Recombinant Cry3Aa	169	95	1044			Control	146	200	1093			Natural Cry3Aa	162	178	1119
	day 5	Recombinant Cry3Aa	306	448	937		day 5	Control	312	231	781		day 5	Natural Cry3Aa	449	448	1104
		Recombinant Cry3Aa	381	447	1030			Control	418	92	740			Natural Cry3Aa	350	459	1067
		Recombinant Cry3Aa	390	385	989			Control	354	292	841			Natural Cry3Aa	342	420	1116
		Recombinant Cry3Aa	311	366	984			Control	324	370	912			Natural Cry3Aa	308	543	1094
		Recombinant Cry3Aa	399	396	1100			Control	403	241	829			Natural Cry3Aa	436	239	890
	day 6	Recombinant Cry3Aa	446	412	1129		day 6	Control	489	181	981		day 6	Natural Cry3Aa	699	403	1093
		Recombinant Cry3Aa	596	441	1211			Control	658	327	1128			Natural Cry3Aa	559	432	1158
		Recombinant Cry3Aa	642	99	1084			Control	534	279	1080			Natural Cry3Aa	560	182	1110
		Recombinant Cry3Aa	537	128	1009			Control	509	391	1134			Natural Cry3Aa	507	63	1103
		Recombinant Cry3Aa	700	228	1202			Control	610	340	1185			Natural Cry3Aa	720	539	1143
	day 6	Recombinant Cry3Aa	570				day 7	Control	712	106	777		day 7	Natural Cry3Aa	632
		Recombinant Cry3Aa	541					Control	745					Natural Cry3Aa	626	445	817
		Recombinant Cry3Aa	966	260	871			Control	748		1009			Natural Cry3Aa	857	96	748
		Recombinant Cry3Aa	766					Control	638					Natural Cry3Aa	904	48	712
		Recombinant Cry3Aa	790	383	775			Control	691	145	971			Natural Cry3Aa	677
	FITNESS PARAMETERS
	number of individuals	treatment	sex	initial larval weight [mg]	weight increment [mg]	maximal body weight [mg]	length of fifth instar [day]	length of sixth instar [day]	length of prepupal stage [day]	pupal weight [mg]		number of individuals	treatment	sex	Length of pupal stage [day]
	1	Recombinant Cry3Aa	M	62	508	570	2	4	3	224		1	Recombinant Cry3Aa	M	8
	2	Recombinant Cry3Aa	M	65	531	596	2	3	3	253		2	Recombinant Cry3Aa	M	9
	3	Recombinant Cry3Aa	M	55	711	766	3	3	3	258		3	Recombinant Cry3Aa	M	8
	4	Recombinant Cry3Aa	M	60	730	790	3	3	3	277		4	Recombinant Cry3Aa	M	8
	5	Recombinant Cry3Aa	M	56	769	825	2	3	2	306		5	Recombinant Cry3Aa	M	9
	6	Recombinant Cry3Aa	M	55	723	778	3	3	3	298		6	Recombinant Cry3Aa	M	8
	7	Recombinant Cry3Aa	M	58	739	797	2	2	4	340		7	Recombinant Cry3Aa	M	9
	8	Recombinant Cry3Aa	M	65	747	818	2	2	3	316		8	Recombinant Cry3Aa	M	9
	9	Recombinant Cry3Aa	M	59	827	886	2	3	2	296		9	Recombinant Cry3Aa	M	9
	10	Recombinant Cry3Aa	M	65	998	1063	2	3	3	353		10	Recombinant Cry3Aa	M	9
	11	Recombinant Cry3Aa	M	62	594	656	2	4	3	291		11	Recombinant Cry3Aa	M	8
	12	Recombinant Cry3Aa	M	61	725	786	2	3	2	287		12	Recombinant Cry3Aa	M	9
	13	Recombinant Cry3Aa	M	60	836	896	2	3	3	321		13	Recombinant Cry3Aa	M	8
	14	Recombinant Cry3Aa	M	62	858	920	2	3	3	337		14	Recombinant Cry3Aa	M	8
	15	Recombinant Cry3Aa	M	57	833	890	2	3	3	337		15	Recombinant Cry3Aa	M	8
	16	Recombinant Cry3Aa	M	64	938	1002	2	3	3	324		16	Recombinant Cry3Aa	M	9
	17	Recombinant Cry3Aa	M	64	826	890	3	3	2	336		17	Recombinant Cry3Aa	M	8
	18	Recombinant Cry3Aa	M	58	916	974	2	3	3	344		18	Recombinant Cry3Aa	F	7
	19	Recombinant Cry3Aa	F	65	901	966	2	4	3	331		19	Recombinant Cry3Aa	F	7
	20	Recombinant Cry3Aa	F	59	1041	1100	3	3	3	354		20	Recombinant Cry3Aa	F	8
	21	Recombinant Cry3Aa	F	55	1075	1130	2	4	3	364		21	Recombinant Cry3Aa	F	8
	22	Recombinant Cry3Aa	F	55	691	746	2	3	3	316		22	Recombinant Cry3Aa	F	8
	23	Recombinant Cry3Aa	F	60	856	916	3	3	3	321		23	Recombinant Cry3Aa	F	8
	24	Recombinant Cry3Aa	F	65	867	932	2	3	3	291		24	Recombinant Cry3Aa	F	8
	25	Recombinant Cry3Aa	F	60	750	810	2	4	2	354		25	Recombinant Cry3Aa	F	8
	26	Recombinant Cry3Aa	F	58	884	942	2	4	3	330		26	Recombinant Cry3Aa	F	8
	27	Recombinant Cry3Aa	F	55	870	925	2	2	4	375		27	Recombinant Cry3Aa	F	7
	28	Recombinant Cry3Aa	F	56	987	1043	2	3	3	350		28	Recombinant Cry3Aa	F	9
	29	Recombinant Cry3Aa	F	59	823	882	2	3	3	372		29	Recombinant Cry3Aa	F	7
	30	Recombinant Cry3Aa	F	63	955	1018	2	3	3	403		30	Recombinant Cry3Aa	F	7
	31	Recombinant Cry3Aa	F	65	975	1040	2	3	3	369		1	Control	M	8
	32	Recombinant Cry3Aa	F	59	870	929	2	3	3	378		2	Control	M	9
	33	Recombinant Cry3Aa	F	61	775	836	2	3	3	339		3	Control	M	9
	34	Recombinant Cry3Aa	F	65	850	915	2	3	3	358		4	Control	M	9
	1	Control	M	65	647	712	3	3	3	299		5	Control	M	9
	2	Control	M	65	680	745	3	3	2	289		6	Control	M	9
	3	Control	M	55	583	638	3	3	2	238		7	Control	M	8
	4	Control	M	63	547	610	3	3	2	283		8	Control	M	8
	5	Control	M	62	894	956	2	3	3	336		9	Control	M	9
	6	Control	M	59	596	655	2	4	2	266		10	Control	M	8
	7	Control	M	59	584	643	2	3	3	279		11	Control	M	9
	8	Control	M	64	557	621	3	3	2	243		12	Control	M	9
	9	Control	M	60	605	665	3	3	2	275		13	Control	M	9
	10	Control	M	57	819	876	3	3	3	334		14	Control	M	9
	11	Control	M	63	968	1031	2	3	3	341		15	Control	M	9
	12	Control	M	62	1053	1115	2	2	3	335		16	Control	F	7
	13	Control	M	55	915	970	2	2	4	343		17	Control	F	8
	14	Control	M	59	1073	1132	2	3	3	347		18	Control	F	8
	15	Control	M	62	1089	1151	2	3	3	360		19	Control	F	7
	16	Control	M	58	879	937	2	3	2	312		20	Control	F	7
	17	Control	F	60	772	832	3	3	3	329		21	Control	F	7
	18	Control	F	54	668	722	3	3	2	299		22	Control	F	7
	19	Control	F	65	957	1022	3	3	2	383		23	Control	F	8
	20	Control	F	60	721	781	2	3	3	298		24	Control	F	7
	21	Control	F	58	690	748	2	3	3	304		25	Control	F	8
	22	Control	F	56	751	807	2	3	3	329		26	Control	F	8
	23	Control	F	63	924	987	3	3	3	383		27	Control	F	8
	24	Control	F	57	750	807	2	4	3	307		28	Control	F	8
	25	Control	F	58	828	886	2	4	2	334		1	Natural Cry3Aa	M	10
	26	Control	F	58	857	915	2	4	3	350		2	Natural Cry3Aa	M	11
	27	Control	F	57	1040	1097	2	3	3	388		3	Natural Cry3Aa	M	10
	28	Control	F	61	1191	1252	2	3	3	429		4	Natural Cry3Aa	M	9
	29	Control	F	65	1169	1234	2	3	3	380		5	Natural Cry3Aa	M	10
	30	Control	F	60	1126	1186	2	3	3	392		6	Natural Cry3Aa	M	10
	31	Control	F	60	1217	1277	2	3	3	349		7	Natural Cry3Aa	M	10
	32	Control	F	61	1148	1209	2	3	3	378		8	Natural Cry3Aa	M	12
	33	Control	F	57	1140	1197	2	3	3	395		9	Natural Cry3Aa	M	8
	1	Natural Cry3Aa	M	65	634	699	2	3	3	282		10	Natural Cry3Aa	M	8
	2	Natural Cry3Aa	M	60	566	626	2	4	2	261		11	Natural Cry3Aa	M	9
	3	Natural Cry3Aa	M	60	797	857	3	3	3	332		12	Natural Cry3Aa	M	8
	4	Natural Cry3Aa	M	59	845	904	3	3	3	335		13	Natural Cry3Aa	M	8
	5	Natural Cry3Aa	M	59	512	571	2	3	3	222		14	Natural Cry3Aa	M	9
	6	Natural Cry3Aa	M	60	631	691	2	4	2	288		15	Natural Cry3Aa	M	9
	7	Natural Cry3Aa	M	54	744	798	2	3	3	306		16	Natural Cry3Aa	M	9
	8	Natural Cry3Aa	M	58	821	879	2	3	3	310		17	Natural Cry3Aa	F	9
	9	Natural Cry3Aa	M	55	790	845	3	3	1	317		18	Natural Cry3Aa	F	8
	10	Natural Cry3Aa	M	55	632	687	2	2	3	269		19	Natural Cry3Aa	F	8
	11	Natural Cry3Aa	M	58	696	754	2	3	3	327		20	Natural Cry3Aa	F	9
	12	Natural Cry3Aa	M	59	815	874	2	3	3	310		21	Natural Cry3Aa	F	8
	13	Natural Cry3Aa	M	55	747	802	2	3	3	322		22	Natural Cry3Aa	F	7
	14	Natural Cry3Aa	M	58	870	928	2	3	3	291		23	Natural Cry3Aa	F	7
	15	Natural Cry3Aa	M	58	753	811	2	3	2	268		24	Natural Cry3Aa	F	7
	16	Natural Cry3Aa	M	55	936	991	2	3	2	320		25	Natural Cry3Aa	F	7
	17	Natural Cry3Aa	M	65	932	997	2	3	3	327		26	Natural Cry3Aa	F	8
	18	Natural Cry3Aa	F	64	656	720	2	3	3	249		27	Natural Cry3Aa	F	7
	19	Natural Cry3Aa	F	53	786	839	3	3	3	306		28	Natural Cry3Aa	F	7
	20	Natural Cry3Aa	F	62	911	973	2	4	3	336		29	Natural Cry3Aa	F	8
	21	Natural Cry3Aa	F	58	1007	1065	3	3	3	384
	22	Natural Cry3Aa	F	60	913	973	2	3	3	351
	23	Natural Cry3Aa	F	59	892	951	2	3	3	382
	24	Natural Cry3Aa	F	64	1009	1073	2	3	3	384
	25	Natural Cry3Aa	F	63	857	920	2	3	3	350
	26	Natural Cry3Aa	F	60	807	867	2	3	3	345
	27	Natural Cry3Aa	F	60	928	988	3	3	2	393
	28	Natural Cry3Aa	F	63	1114	1177	2	3	3	359
	29	Natural Cry3Aa	F	63	905	968	2	3	3	306
	30	Natural Cry3Aa	F	58	827	885	2	2	3	289
	ADULTS
		day 1				day 2				day 3				day 4				day 5				day 6				day 7				day 8				day 9				day 10				day 11				day 12
	treatment	no of eggs	hatched	female death		no of eggs	hatched	female death		no of eggs	hatched	female death		no of eggs	hatched	female death		no of eggs	hatched	female death		no of eggs	hatched	female death		no of eggs	hatched	female death		no of eggs	hatched	female death		no of eggs	hatched	female death		no of eggs	hatched	female death		no of eggs	hatched	female death		no of eggs	hatched	female death
	Recombinant Cry3Aa									345	51			1052	878			554	519			399	374			359	342			197	187
	Recombinant Cry3Aa									19	0			0	0			0	0			29	24			0	0			155	61			52	31			64	0			91	0			117	0
	Recombinant Cry3Aa					964	928			535	399			642	630			606	596			277	226			312	208			95	66			132	80			52	0			55	0
	Recombinant Cry3Aa					742	522			475	258			665	477			323	197			345	289			193	141			108	56			26	9
	Recombinant Cry3Aa					11	0			305	12			931	170			344	202			423	338					KO
	Recombinant Cry3Aa					294	78			0	0			0	0			332	7			89	36					KO
	Recombinant Cry3Aa					1533	1415			538	497			504	470			346	323					KO
	Recombinant Cry3Aa					386	305			622	447			590	506			606	591			296	264			304	284			143	118			121	112			48	0			54	0
	Recombinant Cry3Aa													4	0			63	0			371	0			163	0			510	0			120	0			64	0
	Recombinant Cry3Aa					365	132			848	586			376	309
	Recombinant Cry3Aa	260	199			455	314			546	444			389	313			468	326			438	346			280	0			176	0			116	0			65	0
	Recombinant Cry3Aa					443	378			612	446			460	412			219	216			443	389			132	0											41	0
	Recombinant Cry3Aa	665	417			727	365			590	514			429	221			68	34			439	0			140	0			64	0			31	0
	Recombinant Cry3Aa					21	0			1558	1387			619	554			352	329			432	412			172	0			65	0			3	0
	Natural Cry3Aa									6	0			42	4			53	0			98	82			95	56			157	79			707	138			224	0			179	0			109	0
	Natural Cry3Aa									401	349			755	733			598	590			327	319			347	340			163	159			0	0			120	90							64	51
	Natural Cry3Aa									561	128			770	652			427	290			195	170			393	368			156	119			0	0			344	261							59	27
	Natural Cry3Aa									446	89			734	502			174	16			168	143			463	405			261	127			247	173			134	45			65	7			64	2
	Natural Cry3Aa													360	43			539	437			455	428			368	321			212	149			236	168			158	14							36	11
	Natural Cry3Aa																	502	483			516	493			368	363			400	355			513	479			186	183			146	116			0	0
	Natural Cry3Aa																	895	487			324	293			373	365			217	165			163	149			134	110			595	556			0	0
	Natural Cry3Aa													620	72			300	147			526	498
	Natural Cry3Aa																	73	0
	Natural Cry3Aa																					738	428			542	537			355	339			366	334			252	240
	Natural Cry3Aa	1206	961			512	503			412	363			457	394			162	92			145	107			213	0			87	0			61	0			22	0
	Natural Cry3Aa	774	624			560	553			375	371			431	425			161	149			104	95			0	0			139	0			65	0			38	0
	Natural Cry3Aa	1180	965			866	849			264	242			423	419			130	120			124	117			103	0			95	0			26	0
	Natural Cry3Aa	513	105			152	129			0	0			54	0			0	0			0	0			4	0
	Natural Cry3Aa					165	3			874	0			333	84			357	140			225	131			367	0			188	0			44	0			102	0
	Natural Cry3Aa					1118	278			547	188			520	505			182	178			154	143			175	0			127	0			54	0			67	0
	Control	684	514			557	363			890	709			584	385			355	45			183	130			24	7
	Control	576	421			549	498			576	157			426	308			165	122			266	192			166	40			48	0
	Control	451	379			442	432			468	412			453	415			130	76			421	403			329	264			109	84			98	63
	Control	514	476			544	480			767	714			709	680			362	362			345	295			332	294			99	85			130	82			89	19
	Control									710	228			486	283			466	338			420	367			284	196			124	71			41	13			29	0			0	0			7	0
	Control									1149	562			519	493			318	195			588	573			348	332			122	20			136	85			86	35			69	1			6	0
	Control									641	34			829	700			632	605			581	524			361	324			204	172			29	5			99	0			73	2			85	3
	Control					576	542			934	833			504	489			486	472							137	128			76	38			68	36
	Control					35	0			5	0			178	0			112	12			90	0			55	24			192	0			315	189			143	0
	Control									675	97			719	463			540	392			286	231			260	186			174	126			145	117
	Control					17	0											34	0			24	8			179	0			67	0			19	4
	Control									976	174			836	461			452	427			334	307			250	222			116	101			103	62			42	12			10	1
	Control									1074	94			512	353			486	394			303	256			297	215			83	71			128	94			69	0
	Control													4	0							32	4			97	4			31	0			672	636							9	0
	Control									544	0			475	131			752	708			248	204			339	143			141	80			122	68			78	0			62	0
	Control													632	69			707	538			427	388			435	399			120	111			15	6			24	3			14	7
	Control	872	560			413	372			533	527			354	334			627	610			337	325			272	0			160	0			41	0			101	0
	Control					284	225			806	625			175	136			206	3
	Control					491	274			521	328			422	198			510	384			424	378			263	0			232	0			109	0			59	0
	Control													46	0			89	0			285	163			86	0			125	0			110	0			68	0
[truncated: 3 more columns]

## Sheet: S2_I
S2: I	Original raw data of the bioassay 3 including the exact number of S. littoralis used for statistical analyses
N
	VAPOR FOR ECI (EFFICIENCY OF CONVERSION OF INGESTED MATERIALS) CALCULATION
	treatment	fresh leaf [mg]	24 h old leaf [mg]
	SNL	2086	1774
		1836	1731
	Control	2082	2040
		1791	1558
	GROWTH OF BODY WEIGHT AND ECI (EFFICIENCY OF CONVERSION OF INGESTED MATERIALS)
		treatment	larval weight [mg]	fresh leaf [mg]	24 h old leaf [mg]			treatment	larval weight [mg]	fresh leaf [mg]	24 h old leaf [mg]
	day 1	SNL 1	74	982	948		day 1	Control 1	78	1435	1100
		SNL 2	76	1021	489			Control 2	76	1452	989
		SNL 3	72	1307	873			Control 3	77	644	450
		SNL 4	74	804	431			Control 4	78	706	276
		SNL 5	72	816	648			Control 5	77	1014	237
	day 2	SNL 1	215	2246	1516		day 2	Control 1	188	1662	1445
		SNL 2	199	2536	2082			Control 2	165	1616	1499
		SNL 3	203	1992	1392			Control 3	190	2436	2076
		SNL 4	162	1340	605			Control 4	192	3378	2784
		SNL 5	190	1851	1545			Control 5	177	1373	919
	day 3	SNL 1	258	1954	619		day 3	Control 1	239	2295	1163
		SNL 2	244	1791	715			Control 2	191	1469	650
		SNL 3	246	1822	718			Control 3	264	1352	311
		SNL 4	194	1410	459			Control 4	303	1495	508
		SNL 5	235	1836	797			Control 5	211	1356	459
	day 4	SNL 1	531	2350	1024		day 4	Control 1	582	2587	1857
		SNL 2	629	2261	1004			Control 2	447	2837	1332
		SNL 3	585	2502	1203			Control 3	529	2652	1610
		SNL 4	454	2567	866			Control 4	545	2837	1298
		SNL 5	581	2615	1007			Control 5	503	2783	981
	day 5	SNL 1	1102	3267	1296		day 5	Control 1	982	2880	1237
		SNL 2	1030	3244	1535			Control 2	826	2575	976
		SNL 3	933	2968	1696			Control 3	950	3172	1489
		SNL 4	858	3725	958			Control 4	928	2441	876
		SNL 5	1007	3313	1654			Control 5	876	3777	1822
	day 6	SNL 1	1422				day 6	Control 1	898
		SNL 2	1351					Control 2	859
		SNL 3	873					Control 3	878
		SNL 4	1079					Control 4	826
		SNL 5	964					Control 5	937
	FITNESS PARAMETERS
	number of individuals	treatment	sex	initial larval weight [mg]	weight increment [mg]	maximal body weight [mg]	length of fifth instar [day]	length of sixth instar [day]	length of prepupal stage [day]	pupal weight [mg]	Length of pupal stage [day]
	1	SNL	M	72	861	933	2	3	2	320	11
	2	SNL	M	72	935	1007	2	3	2	326	11
	3	SNL	M	75	808	883	2	4	1	298	11
	4	SNL	M	71	882	953	3	3	2	288	10
	5	SNL	M	72	797	869	2	4	1	311	11
	6	SNL	M	74	686	760	3	2	2	242	11
	7	SNL	M	79	845	924	2	3	2	318	11
	8	SNL	M	79	741	820	2	3	3	292	10
	9	SNL	M	74	833	907	2	4	1	303	11
	10	SNL	M	73	864	937	2	3	2	313	11
	11	SNL	F	74	1348	1422	2	4	2	407	10
	12	SNL	F	76	1275	1351	2	4	2	393	10
	13	SNL	F	74	1005	1079	3	3	2	300	10
	14	SNL	F	77	1019	1096	2	4	2	368	10
	15	SNL	F	78	1023	1101	2	4	2	345	10
	16	SNL	F	74	1045	1119	3	3	3	394	10
	17	SNL	F	73	983	1056	2	4	2	326	9
	1	Control	M	76	783	859	2	4	2	304	10
	2	Control	M	77	873	950	2	3	2	342	11
	3	Control	M	78	850	928	2	3	2	320	11
	4	Control	M	77	860	937	2	4	1	310	11
	5	Control	M	71	804	875	2	4	1	314	11
	6	Control	M	76	835	911	2	3	2	346	11
	7	Control	M	77	1065	1142	3	3	2	326	11
	8	Control	M	72	811	883	2	4	1	313	11
	9	Control	F	78	904	982	2	3	2	334	11
	10	Control	F	75	1017	1092	3	3	2	374	10
	11	Control	F	75	1198	1273	3	3	2	391	9
	12	Control	F	79	1148	1227	3	3	1	393	10
	13	Control	F	74	958	1032	2	4	1	323	10
	14	Control	F	78	878	956	2	5	1	288	11
	15	Control	F	75	805	880	2	4	1	334	10
	16	Control	F	78	1078	1156	3	3	2	378	10
	17	Control	F	72	1217	1289	3	3	3	369	9
	18	Control	F	78	1100	1178	3	3	2	338	10
	19	Control	F	72	1042	1114	3	3	2	368	10
	20	Control	F	76	1065	1141	2	4	2	361	10
	ADULTS
		day 1			day 2			day 3			day 4			day 5			day 6			day 7			day 8			day 9			day 10
	treatment	no of eggs	hatched		no of eggs	hatched		no of eggs	hatched		no of eggs	hatched		no of eggs	hatched		no of eggs	hatched		no of eggs	hatched		no of eggs	hatched		no of eggs	hatched		no of eggs	hatched
	Control				1007	353		149	106		483	410		259	241		227	214		202	174		123	88		25	0
	Control	585	78		264	223		428	384		265	248		167	142		98	58		126	52		78	39
	Control				571	139		175	6		306	209		167	99		146	114		80	35		17	0		21	0
	Control	536	446		700	286		820	740		379	305		262	106		0	0		32	11
	Control	161	146		121	17		83	19		0	0		9	1		0	0		10	0
	Control				443	338		244	10		317	45		119	8		430	132		84	11		253	167		23	0		349	0
	Control							776	261		0	0		23	0		78	54		0	0		131	0
	Control				902	778		703	674		363	344		437	401		308	245		229	209		0	0		142	51		76	0
		no of eggs	hatched		no of eggs	hatched		no of eggs	hatched		no of eggs	hatched		no of eggs	hatched		no of eggs	hatched		no of eggs	hatched		no of eggs	hatched		no of eggs	hatched		no of eggs	hatched
	SNL				656	102		437	0		458	113		131	18		229	68		213	205		219	0		226	0		102	0
	SNL				1304	772		546	413		681	657		522	473		294	269		206	74		124	0
	SNL				59	0		626	0		103	9		172	22		84	15		49	0		46	0		104	0		29	0
	SNL				1275	925		377	326		619	571		519	52		305	256		228	135		155	0		84	44		38	0
	SNL	278	249		98	11		72	28		21	0		0	0		302	4		0	0		0	0		10	0
	SNL	423	398		266	77		662	46		133	11		0	0		141	18		44	2		39	0		49	0		14	0
	SNL				158	121		1119	211		709	652		556	556		431	421		234	210		257	174		179	73		24	0
NRC
	VAPOR FOR ECI (EFFICIENCY OF CONVERSION OF INGESTED MATERIALS) CALCULATION
	treatment	fresh leaf [mg]	24 h old leaf [mg]
	SNL	771	754
		954	877
		1436	1307
		1570	1352
		1988	1572
	Control	1665	1504
		1175	1008
		1465	1089
		2042	1703
		1630	1297
	GROWTH OF BODY WEIGHT AND ECI (EFFICIENCY OF CONVERSION OF INGESTED MATERIALS)
		treatment	larval weight [mg]	fresh leaf [mg]	24 h old leaf [mg]			treatment	larval weight [mg]	fresh leaf [mg]	24 h old leaf [mg]
	day 1	SNL 1	70	836	731		day 1	Control 1	75	1411	777
		SNL 2	71	1113	373			Control 2	75	1493	597
								Control 3	73	1406	544
	day 2	SNL 1	197	1512	1191
		SNL 2	162	1427	1275		day 2	Control 1	213	1373	1336
								Control 2	178	1432	1557
	day 3	SNL 1	225	1768	486			Control 3	200	1091	922
		SNL 2	224	1639	248
							day 3	Control 1	243	2192	426
	day 4	SNL 1	691	1549	1310			Control 2	204	1871	592
		SNL 2	549	2043	1000			Control 3	224	2050	724
	day 5	SNL 1	1000	3032	2243		day 4	Control 1	556	2257	932
		SNL 2	1022	2798	1298			Control 2	529	2577	1771
								Control 3	542	1897	889
							day 5	Control 1	1048	3092	1368
								Control 2	492	2940	1672
								Control 3	858	3149	1398
	FITNESS PARAMETERS
	number of individuals	treatment	sex	initial larval weight [mg]	weight increment [mg]	maximal body weight [mg]	length of fifth instar [day]	length of sixth instar [day]	length of prepupal stage [day]	pupal weight [mg]	Length of pupal stage [day]
	1	SNL	M	70	930	1000	2	3	2	324	9
	2	SNL	M	74	1030	1104	2	3	2	348	10
	3	SNL	M	72	953	1025	2	3	2	355	10
	4	SNL	M	72	917	989	2	3	2	333	10
	5	SNL	M	70	669	739	2	3	2	355	10
	6	SNL	M	70	788	858	2	3	2	316	10
	7	SNL	M	72	840	912	2	3	3	305	9
	8	SNL	M	76	1011	1087	2	3	2	367	10
	9	SNL	M	72	803	875	2	3	3	314	9
	10	SNL	F	71	951	1022	2	3	2	339	10
	11	SNL	F	70	947	1017	2	3	3	333	9
	12	SNL	F	72	1002	1074	2	3	3	368	8
	13	SNL	F	70	1074	1144	2	3	3	393	8
	14	SNL	F	73	875	948	2	3	2	312	9
	1	Control	M	75	454	529	2	2	3	343	9
	2	Control	M	73	785	858	2	4	2	329	9
	3	Control	M	70	928	998	2	3	3	330	8
	4	Control	M	70	859	929	2	3	3	324	8
	5	Control	M	73	901	974	2	4	2	330	8
	6	Control	M	73	979	1052	2	4	2	337	8
	7	Control	M	70	960	1030	2	3	3	327	8
	8	Control	M	73	833	906	2	4	2	313	9
	9	Control	M	72	887	959	2	4	2	334	9
	10	Control	M	70	993	1063	2	3	3	333	8
	11	Control	M	77	785	862	2	4	2	309	8
	12	Control	M	70	815	885	2	3	3	323	8
	13	Control	F	75	973	1048	2	4	2	361	8
	14	Control	F	71	794	865	2	3	3	312	8
	15	Control	F	72	978	1050	2	4	2	336	8
	16	Control	F	76	1019	1095	2	3	3	375	8
	17	Control	F	70	888	958	2	3	3	335	8
	18	Control	F	76	906	982	2	3	3	366	8
	19	Control	F	75	844	919	2	3	3	316	8
	ADULTS
		day 1				day 2				day 3				day 4				day 5				day 6				day 7				day 8				day 9				day 10				day 11
	treatment	no of eggs	hatched	female death		no of eggs	hatched	female death		no of eggs	hatched	female death		no of eggs	hatched	female death		no of eggs	hatched	female death		no of eggs	hatched	female death		no of eggs	hatched	female death		no of eggs	hatched	female death		no of eggs	hatched	female death		no of eggs	hatched	female death		no of eggs	hatched	female death
	Control	610	315			328	284			538	460			619	495			411	370			200	138			181	114			86	53			25	0			40	0
	Control	17	0			73	22			90	47			140	6			419	307			77	2			227	0
	Control	903	693			396	371			594	522			478	402			270	219			225	161			232	171			152	101			89	2			69	0
	Control	887	847			579	578			658	652			462	462			325	316			89	84			141	134			45	19			10	0			38	0
	Control	854	837			609	596			731	719			620	614			92	89			31	31			380	368			145	139			43	0			10	0
	Control	756	466			686	592			641	559			475	451			389	297			159	98			170	124			64	1			40	0			4	0
	Control					648	127			298	265			483	430			438	412			136	82			160	114			31	11							10	0
	SNL					651	233			691	603			500	497			764	735			179	160			284	278			151	3			61	0			35	0
	SNL					670	54			958	849			860	846			573	564			149	122									KO
	SNL					421	371			709	653			554	550			558	555			163	155			164	149			101	64			85	1			32	0			5	0	0
	SNL									1243	1099			637	633			358	327			141	91			149	135			86	55			97	0			0	0			27	0	0
	SNL					287	38
CU
	VAPOR FOR ECI (EFFICIENCY OF CONVERSION OF INGESTED MATERIALS) CALCULATION
	treatment	fresh leaf [mg]	24 h old leaf [mg]
	SNL	2406	2176
		2168	2082
		2792	2422
		2234	1718
		2328	2168
		2330	2062
	Control	2297	2203
		3796	2980
		2664	2223
	GROWTH OF BODY WEIGHT AND ECI (EFFICIENCY OF CONVERSION OF INGESTED MATERIALS)
		treatment	larval weight [mg]	fresh leaf [mg]	24 h old leaf [mg]			treatment	larval weight [mg]	fresh leaf [mg]	24 h old leaf [mg]
	day 1	SNL 1	80	1843	1641		day 1	Control 1	79	2150	1754
		SNL 2	70	1727	1148			Control 2	80	1819	1345
		SNL 3	73	2485	1648			Control 3	78	2579	1781
		SNL 4	70	2011	1372			Control 4	70	1701	1165
	day 2	SNL 1	127	1913	1445		day 2	Control 1	96	2374	1259
		SNL 2	150	1918	1597			Control 2	165	2680	1940
		SNL 3	186	2228	1674			Control 3	135	2864	2544
		SNL 4	184	1469	794			Control 4	190	1853	1119
	day 3	SNL 1	230	3123	1530		day 3	Control 1	292	2671	1308
		SNL 2	221	2732	1513			Control 2	282	2760	1314
		SNL 3	215	2967	1554			Control 3	163	2300	1207
		SNL 4	315	2533	939			Control 4	294	2085	618
	day 4	SNL 1	451	2293	876		day 4	Control 1	607	3210	1691
		SNL 2	485	3885	1642			Control 2	477	3267	1773
		SNL 3	573	2475	709			Control 3	429	3996	1880
		SNL 4	683	4451	1779			Control 4	635	3474	858
	day 5	SNL 1	494	3984			day 5	Control 1	439	2223	1514
		SNL 2	772	3043	2016			Control 2	504	3206	chcíp
		SNL 3	965	4270	2123			Control 3	705	2921	1171
		SNL 4	659	3171	1673			Control 4	940	3656	2121
	FITNESS PARAMETERS
	number of individuals	treatment	sex	initial larval weight [mg]	weight increment [mg]	maximal body weight [mg]	length of fifth instar [day]	length of sixth instar [day]	pupal weight [mg]	length of prepupal stage [day]	Length of pupal stage [day]
	1	SNL	M	70	702	772	2	3	260	2	9
	2	SNL	M	73	892	965	2	3	378	2	9
	3	SNL	M	70	589	659	2	3	258	2	8
	4	SNL	M	73	750	823	2	3	276	2	8
	5	SNL	M	75	584	659	2	3	249	1	9
	6	SNL	M	70	686	756	2	3	258	2	8
	7	SNL	M	71	834	905	2	3	268	2	8
	8	SNL	F	73	968	1041	2	3	304	2	7
	9	SNL	F	76	794	870	3	2	307	2	7
	10	SNL	F	75	782	857	2	3	275	2	7
	11	SNL	F	79	776	855	2	3	305	2	7
	12	SNL	F	80	735	815	2	3	253	2	7
	13	SNL	F	75	670	745	2	3	266	2	7
	14	SNL	F	73	693	766	2	4	254	1	7
	15	SNL	F	72	749	821	3	2	314	2	7
	16	SNL	F	71	972	1043	2	3	387	2	7
	1	Control	M	79	360	439	2	3	213	2	7
	2	Control	M	73	894	967	2	3	339	2	9
	3	Control	M	72	712	784	2	3	277	2	9
	4	Control	M	78	694	772	2	3	295	2	9
	5	Control	M	75	645	720	2	3	255	1	9
	6	Control	M	74	537	611	2	3	257	1	9
	7	Control	M	75	811	886	2	3	256	1	9
	8	Control	M	75	655	730	2	3	257	2	8
	9	Control	M	80	632	712	3	2	275	1	9
	10	Control	F	78	627	705	2	3	262	2	7
	11	Control	F	70	870	940	2	3	353	2	7
	12	Control	F	70	1083	1153	2	3	339	2	7
	13	Control	F	75	770	845	2	3	294	2	7
	14	Control	F	72	651	723	2	3	296	2	8
	15	Control	F	73	630	703	2	3	289	1	8
	16	Control	F	76	414	490	2	3	245	1	8
	17	Control	F	78	1069	1147	2	3	351	2	8
	18	Control	F	71	848	919	2	3	321	2	7
	ADULTS
		day 1			day 2			day 3			day 4			day 5			day 6			day 7			day 8			day 9			day 10
	treatment	no of eggs	hatched		no of eggs	hatched		no of eggs	hatched		no of eggs	hatched		no of eggs	hatched		no of eggs	hatched		no of eggs	hatched		no of eggs	hatched		no of eggs	hatched		no of eggs	hatched
	Control	656	498		541	541		273	273		239	239		157	126		101	89		56	32
	Control	516	359		590	590		85	85		433	427		277	272		168	161		104	96		73	61
	Control				891	745		262	196		784	766		374	374		193	79		73	59		26	17
	Control				1054	857		219	201		390	362		331	308		261	248		172	166		79	64		10	7		13	8
	Control	1120	1067		596	581		283	283		217	210
	Control	615	610		505	505		143	143		186	186		57	46		96	94		96	68		45	0
	Control	472	423		980	884		193	193		728	712		196	188		257	257		177	166		81	70		43	15
	Control				1215	1133		233	217		635	631		480	479		316	313		212	209		36	35
	SNL	766	454		715	637		479	466		226	208		325	308		194	82		96	83
	SNL				712	305		181	0					350	276		37	0		43	31
	SNL	540	15		399	360		232	184		193	147		248	211		167	142		29	25
	SNL	1017	883		646	646		203	203		81	79		156	153		87	65		33	14
	SNL	430	361		271	235		202	167		65	39		83	40		15	0
	SNL	960	373		501	468		333	305		389	383		187	182		181	179		63	57		45	42
	SNL	551	50		643	610		216	133		364	361		257	236		83	61
SE
	VAPOR FOR ECI (EFFICIENCY OF CONVERSION OF INGESTED MATERIALS) CALCULATION
	treatment	fresh leaf [mg]	24 h old leaf [mg]
	SNL	2425	1406
		1747	1426
		1458	1447
		1116	1066
		1441	1261
		1536	1519
	Control	1783	1406
		1702	1030
		2176	1819
		2143	1737
		1215	1186
		2082	1897
	GROWTH OF BODY WEIGHT AND ECI (EFFICIENCY OF CONVERSION OF INGESTED MATERIALS)
		treatment	larval weight [mg]	fresh leaf [mg]	24 h old leaf [mg]			treatment	larval weight [mg]	fresh leaf [mg]	24 h old leaf [mg]
	day 1	SNL 1	61	1533	872		day 1	Control 1	62	1796	554
		SNL 2	56	2147	974			Control 2	56	1850	604
		SNL 3	57	1765	711			Control 3	56	1676	639
		SNL 4	57	2087	973			Control 4	56	2427	1127
		SNL 5	56	2635	2348			Control 5	55	1309	418
	day 2	SNL 1	117	2016	1252		day 2	Control 1	164	1435	1349
		SNL 2	147	2014	1715			Control 2	178	1528	1428
		SNL 3	101	1948	1640			Control 3	146	1522	1185
		SNL 4	137	2419	1582			Control 4	129	1341	1059
		SNL 5	132	1771	1471			Control 5	140	1313	1141
	day 3	SNL 1	22	1724	1531		day 3	Control 1	196	2113	1497
		SNL 2	219	2471	1997			Control 2	201	1957	1246
		SNL 3	194	2072	2063			Control 3	241	1742	1602
		SNL 4	192	1781	1600			Control 4	210	1671	1454
		SNL 5	186	2313	2165			Control 5	190	2155	1814
	day 4	SNL 1	257	1836	766		day 4	Control 1	376	1682	372
		SNL 2	345	1962	433			Control 2	518	2824	971
		SNL 3	203	2109	1022			Control 3	332	2119	564
		SNL 4	261	2445	1185			Control 4	281	3312	1249
		SNL 5	254	2769	1475			Control 5	301	2606	1552
	day 5	SNL 1	577	3031	817		day 5	Control 1	741	2800	1308
		SNL 2	804	2638	405			Control 2	882	2482	1309
		SNL 3	469	2048	490			Control 3	766	3059	1385
		SNL 4	671	2816	1240			Control 4	701	2838	1523
		SNL 5	619	2267	772			Control 5	629	2823	827
	day 6	SNL 1	1182				day 6	Control 1	796
		SNL 2	1000					Control 2	800
		SNL 3	1039					Control 3	1157
		SNL 4	1136					Control 4	990
		SNL 5	851					Control 5	1049
	FITNESS PARAMETERS
	number of individuals	treatment	sex	initial larval weight [mg]	weight increment [mg]	maximal body weight [mg]	length of fifth instar [day]	length of sixth instar [day]	pupal weight [mg]	length of prepupal stage [day]	treatment	sex	Length of pupal stage [day]
	1	SNL	M	57	982	1039	2	4	297	2	SNL	M	10
	2	SNL	M	57	1079	1136	2	4	325	2	SNL	M	10
	3	SNL	M	65	999	1064	3	3	334	2	SNL	M	10
	4	SNL	M	58	765	823	3	3	249	1	SNL	M	10
	5	SNL	M	65	1013	1078	3	3	301	1	SNL	M	10
	6	SNL	M	55	908	963	3	3	291	2	SNL	M	10
	7	SNL	M	57	631	688	2	4	250	1	SNL	M	10
	8	SNL	M	65	652	717	2	4	212	1	SNL	M	10
	9	SNL	M	55	820	875	2	4	274	1	SNL	M	10
	10	SNL	M	65	685	750	2	4	265	1	SNL	M	10
	11	SNL	M	65	819	884	2	4	275	1	SNL	M	9
	12	SNL	M	70	1014	1084	3	3	276	1	SNL	M	11
	13	SNL	M	79	889	968	2	4	302	1	SNL	M	10
	14	SNL	F	61	1121	1182	2	4	322	2	SNL	F	9
	15	SNL	F	56	944	1000	2	4	264	1	SNL	F	9
	16	SNL	F	56	795	851	2	4	265	2	SNL	F	9
	17	SNL	F	57	852	909	3	3	260	2	SNL	F	9
	18	SNL	F	55	901	956	3	3	419	2	SNL	F	9
	19	SNL	F	74	964	1038	2	4	332	2	SNL	F	8
	20	SNL	F	63	947	1010	2	4	327	2	SNL	F	9
	21	SNL	F	60	818	878	2	4	262	2	SNL	F	9
	22	SNL	F	65	988	1053	2	4	310	1	SNL	F	9
	23	SNL	F	55	971	1026	3	5	315	2	SNL	F	9
	24	SNL	F	55	955	1010	2	4	321	2	SNL	F	8
	25	SNL	F	70	1292	1362	2	4	421	2	SNL	F	7
	1	Control	M	62	734	796	2	4	247	1	Control	M	9
	2	Control	M	56	1101	1157	3	3	343	2	Control	M	9
	3	Control	M	56	934	990	3	3	323	2	Control	M	9
	4	Control	M	59	868	927	2	4	242	1	Control	M	9
	5	Control	M	57	871	928	2	4	297	1	Control	M	9
	6	Control	M	65	920	985	2	4	206	1	Control	M	9
	7	Control	M	62	690	752	2	3	269	2	Control	M	10
	8	Control	M	65	1070	1135	3	3	278	1	Control	M	9
	9	Control	M	55	1048	1103	3	3	335	2	Control	M	10
	10	Control	M	55	881	936	2	4	286	1	Control	M	9
	11	Control	M	55	715	770	2	4	245	1	Control	M	10
	12	Control	M	72	776	848	2	4	285	1	Control	M	10
	13	Control	M	78	732	810	2	4	271	1	Control	M	10
	14	Control	M	78	735	813	2	4	261	1	Control	M	10
	15	Control	F	56	826	882	2	4	262	1	Control	F	8
	16	Control	F	55	994	1049	3	3	323	2	Control	F	8
	17	Control	F	63	903	901	2	4	180	1	Control	F	8
	18	Control	F	56	859	915	2	4	268	1	Control	F	8
	19	Control	F	65	636	701	2	3	249	2	Control	F	7
	20	Control	F	55	1085	1140	4	2	361	2	Control	F	9
	21	Control	F	56	944	1000	2	5	304	1	Control	F	8
	22	Control	F	55	769	824	2	5	280	1	Control	F	8
	23	Control	F	63	785	848	2	4	278	1	Control	F	8
	24	Control	F	65	797	862	2	4	268	1	Control	F	9
	25	Control	F	55	925	980	1	5	391	2	Control	F	8
	26	Control	F	65	906	971	1	5	336	2	Control	F	9
	27	Control	F	56	1240	1296	3	3	413	2	Control	F	8
	28	Control	F	55	718	773	4	3	346	2
	ADULTS
		day 1			day 2			day 3			day 4			day 5			day 6			day 7			day 8			day 9			day 10			day 11
	treatment	no of eggs	hatched		no of eggs	hatched		no of eggs	hatched		no of eggs	hatched		no of eggs	hatched		no of eggs	hatched		no of eggs	hatched		no of eggs	hatched		no of eggs	hatched		no of eggs	hatched		no of eggs	hatched
	Control				247	44		665	655		612	238		628	627		614	610		188	1		296	4		98	9
	Control	582	580		796	286		419	378		480	446		355	355		221	218		171	9		95	10		47	47
	Control	283	247		538	214		504	501		415	281		255	248		116	103		139	14		38	12					5	5
	Control							38	0		0	0		0	0		0	0		56	56		149	149		11	11		44	40		56	42
	Control				330	209		646	562		796	124		510	508		427	424		662	1		339	29		276	130		159	27
	Control				823	144		534	191		850	142		531	502		388	352		297	69		112	16		52	25		38	24
	Control				426	0		630	568		528	371		408	408		259	250		309	17		175	5		141	18		80	25
	Control				656	606		476	465		828	481		350	349		19	16
	Control				247	80		418	202		750	406		346	346		223	211		287	3		164	3		122	5
	Control				228	152		786	515		690	432		481	477		474	469		374	0		209	2		178	2		84	16
	Control																									70	21
	Control				866	214		598	281		558	538		346	346					309	0		92	2					43	18
	Control							227	201		795	733		423	421		350	339		324	14		196	7		39	6		9	6
	SNL	629	266		692	674		555	12		546	288		414	409		262	253		164	15		76	38		71	56
	SNL				338	112		727	116		693	441		531	522		322	318		264	17		0	0		304	27		68	32
	SNL				529	319		577	23		903	324		292	290		68	29		167	32		102	4		287	10		122	13
	SNL				419	191		494	188		453	40		388	311		644	467		280	82		104	85		51	51
	SNL							300	245		516	426		443	441		395	394		288	0		135	102		112	25		58	49
	SNL							397	298		483	467		414	412		296	273		186	22		174	102		84	19		65	39
	SNL				601	325		429	377		543	253		568	551		286	286		246	58		134	26		68	68		38	38
	SNL				280	0		283	31		308	269		373	264		234	156		192	97		111	56
	SNL							22	0		553	3		0	0		240	181		311	25		205	132		159	91		10	8
	SNL							456	0		1237	83		459	357		645	597		595	16		332	36		193	9		179	81		131	29
	SNL										735	30		113	71		315	268		307	2		214	67		124	85		27	23		50	31
	SNL							147	0		1214	863		500	495		415	380		301	7		194	18		135	28		31	31
SF
	VAPOR FOR ECI (EFFICIENCY OF CONVERSION OF INGESTED MATERIALS) CALCULATION
	treatment	fresh leaf [mg]	24 h old leaf [mg]
	SNL	1857	1589
		1852	1665
		1590	1463
		2146	1471
		2827	2426
	Control	1949	1674
		2547	2149
		1471	1323
		1305	1031
		1678	1667
		2059	2036
	GROWTH OF BODY WEIGHT AND ECI (EFFICIENCY OF CONVERSION OF INGESTED MATERIALS)
		treatment	larval weight [mg]	fresh leaf [mg]	24 h old leaf [mg]				larval weight [mg]	fresh leaf [mg]	24 h old leaf [mg]
	day 1	SNL 1	72	1469	598		day 1	Control 1	70	1804	1081
		SNL 2	74	2600	1219			Control 2	75	2436	1546
		SNL 3	78	1897	827			Control 3	79	2771	2155
		SNL 4	70	2159	1139
		SNL 5	73	2500	1344		day 2	Control 1	130	2696	1089
								Control 2	96	2224	841
	day 2	SNL 1	132	2236	1736			Control 3	105	1906	639
		SNL 2	228	3177	2257
		SNL 3	182	3256	1988		day 3	Control 1	314	3251	2675
		SNL 4	181	2050	1264			Control 2	300	2111	1266
		SNL 5	150	2314	1547			Control 3	348	2972	1640
	day 3	SNL 1	174	3283	2100		day 4	Control 1	367	2105	569
		SNL 2	328	2070	1283			Control 2	544	3403	1770
		SNL 3	326	1837	1005			Control 3	710	3156	1662
		SNL 4	248	1819	988
		SNL 5	202	2392	1675		day 5	Control 1	914	2869	584
								Control 2	654	2479	2327
	day 4	SNL 1	361	3052	1574			Control 3	643	3581	3228
		SNL 2	748	2136	1011
		SNL 3	661	2157	1973		day 6	Control 1	1339	1795	584
		SNL 4	640	2356	1002			Control 2	PP		2527
		SNL 5	378	2650	1687			Control 3	PP		3228
	day 5	SNL 1	483	4463			day 7	Control 1	1569	2520	359
		SNL 2	1130	3089	1476			Control 2
		SNL 3	901	2772	2342			Control 3
		SNL 4	913	2888	2477
		SNL 5	414	2616			day 8	Control 1	1839	1712	791
								Control 2
	day 6	SNL 1						Control 3
		SNL 2	1131	2785	1476
		SNL 3	PP		2342		day 9	Control 1	1407		516
		SNL 4	PP		2477			Control 2
		SNL 5						Control 3
	day 7	SNL 1
		SNL 2	PP		2416
		SNL 3
		SNL 4
		SNL 5
	FITNESS PARAMETERS
	number of individuals	treatment	sex	initial larval weight [mg]	weight increment [mg]	maximal body weight [mg]	length of fifth instar [day]	length of sixth instar [day]		treatment	sex	pupal weight [mg]	length of prepupal stage [day]		treatment	sex	Length of pupal stage [day]
	1	SNL	M	78	823	901	1	4		SNL	M	296	4		SNL	M	10
	2	SNL	M	70	843	913	1	4		SNL	M	336	4		SNL	M	10
	3	SNL	M	76	621	697	1	4		SNL	M	258	4		SNL	M	11
	4	SNL	M	78	593	671	2	3		SNL	M	221	3		SNL	M	11
	5	SNL	M	80	521	601	1	4		SNL	M	250	4		SNL	M	11
	6	SNL	M	70	1090	1160	1	5		SNL	M	368	5		SNL	M	10
	7	SNL	M	80	569	649	1	4		SNL	M	252	4		SNL	M	11
	8	SNL	M	70	572	642	2	2		SNL	M	255	2		SNL	M	12
	9	SNL	M	71	857	928	1	5		SNL	M	289	5		SNL	M	10
	10	SNL	M	75	703	778	1	4		SNL	M	252	4		SNL	M	10
	11	SNL	M	80	791	871	1	3		SNL	M	268	3		SNL	M	9
	12	SNL	M	75	909	984	1	4		SNL	M	295	4		SNL	F	10
	13	SNL	M	76	578	654	1	3		SNL	M	210	3		SNL	F	10
	14	SNL	M	72	921	993	1	4		SNL	M	303	4		SNL	F	10
	15	SNL	M	78	717	795	1	3		SNL	M	241	3		SNL	F	9
	16	SNL	F	74	1056	1130	1	6		SNL	F	437	1		SNL	F	10
	17	SNL	F	70	1055	1125	1	6		SNL	F	480	1		SNL	F	10
	18	SNL	F	78	1075	1153	1	5		SNL	F	423	1		SNL	F	10
	19	SNL	F	70	1408	1478	1	6		SNL	F	457	2		SNL	F	10
	20	SNL	F	72	1213	1285	1	5		SNL	F	336	2		SNL	F	9
	21	SNL	F	77	1472	1549	1	5		SNL	F	440	2		SNL	F	10
	22	SNL	F	70	1248	1318	1	6		SNL	F	406	1		SNL	F	9
	23	SNL	F	80	1299	1379	1	5		SNL	F	405	1		Control	M	12
	24	SNL	F	72	1040	1112	1	5		SNL	F	401	1		Control	M	11
	25	SNL	F	70	1216	1286	1	5		SNL	F	497	2		Control	M	12
	26	SNL	F	70	1177	1247	1	5		SNL	F	438	1		Control	M	10
	27	SNL	F	71	1045	1116	1	5		SNL	F	433	1		Control	M	11
	28	SNL	F	72	1525	1597	2	3		SNL	F	501	1		Control	M	11
	29	SNL	F	80	1303	1383	1	4		SNL	F	433	1		Control	F	10
	1	Control	M	75	579	654	1	4		Control	M	229	1		Control	F	10
	2	Control	M	79	631	710	1	3		Control	M	234	2		Control	F	10
	3	Control	M	78	1517	1595	2	4		Control	M	440	1		Control	F	10
	4	Control	M	70	517	587	2	3		Control	M	229	1		Control	F	10
	5	Control	M	77	528	605	1	4		Control	M	244	1		Control	F	11
	6	Control	M	75	551	626	2	3		Control	M	233	1
	7	Control	M	78	1261	1339	1	5		Control	M	423	1
	8	Control	M	70	582	652	1	4		Control	M	251	1
	9	Control	M	70	581	651	1	4		Control	M	273	1
	10	Control	M	80	435	515	1	4		Control	M	196	1
	11	Control	M	80	760	840	2	3		Control	M	271	1
	12	Control	M	72	646	718	1	4		Control	M	259	1
	13	Control	M	70	494	564	2	3		Control	M	268	2
	14	Control	M	70	608	678	2	3		Control	M	209	1
	15	Control	M	73	719	792	2	3		Control	M	277	1
	16	Control	M	70	688	758	1	3		Control	M	242	2
	17	Control	M	72	565	637	1	3		Control	M	196	2
	18	Control	M	72	768	840	1	3		Control	M	295	2
	19	Control	M	74	618	692	1	3		Control	M	235	2
	20	Control	M	79	503	582	1	3		Control	F	420	1
	21	Control	F	72	1328	1400	1	5		Control	F	436	1
	22	Control	F	70	1273	1343	1	5		Control	F	447	1
	23	Control	F	80	1452	1532	1	5		Control	F	300	1
	24	Control	F	70	1086	1156	1	5		Control	F	358	1
	25	Control	F	70	385	455	1	6		Control	F	389	1
	26	Control	F	75	942	1017	2	4		Control	F	352	1
	27	Control	F	70	943	1013	2	4		Control	F	259	2
	28	Control	F	70	596	666	2	3
	ADULTS
		day 1				day 2				day 3				day 4				day 5				day 6				day 7				day 8				day 9				day 10				day 11
	treatment	no of eggs	hatched	female death		no of eggs	hatched	female death		no of eggs	hatched	female death		no of eggs	hatched	female death		no of eggs	hatched	female death		no of eggs	hatched	female death		no of eggs	hatched	female death		no of eggs	hatched	female death		no of eggs	hatched	female death		no of eggs	hatched	female death		no of eggs	hatched	female death
	Control					559	375			790	571			743	650			259	151			343	208			97	12					KO
	Control	304	255			728	702			687	651			513	495			333	299			251	169			164	76			107	36			57	1			35	0
	Control					424	0			892	520			453	0			262	0			274	0			133	0			113	0			86	0			41	0
	Control													732	0			580	0					KO
	Control					188	0			7	0
	Control									347	152			271	0			64	0			74	0			61	0					KO
	SNL	588	465			351	276			236	202			333	290			80	50
	SNL					1481	664			641	489			486	364			322	198			214	163			169	96			113	73			61	0			45	0
	SNL	3	0			14	0
	SNL	9	0			32	0			0	0			0	0			21	0			0	0			0	0			14	0			194	0			85	0			273	0
	SNL					101	6			1269	1015			512	460			342	205			222	105			130	17			153	77			101	0			53	0
	SNL	451	332			574	501			648	616			427	408			226	152			171	160													KO
	SNL					9	0			45	0			5	0			235	47			465	0			293	0			147	0			111	0			73	0			131	0
	SNL					326	221			828	779			602	555			614	557			403	361			245	185			171	124			111	33			52	1			26	0
	SNL					550	340			502	479			540	513			267	240			196	19
	SNL													5	0			628	0			775	0			291	0			155	0			178	0			163	6			84	0
	SNL					25	0			0	0			351	0			189	0			128	0			87	0			28	0
